# Supplementary material for: Structures of the σ2 receptor enable docking for bioactive ligand discovery
Source: Springer Nature journal article supplement (doi:10.1038/s41586-021-04175-x), 2021-12-08
Supplement: MOESM3 [file 41586_2021_4175_MOESM3_ESM.xlsx]

## Sheet: primary_hits
No.	ZINC ID	Catalog ID	DOCK score (kcal/mol)	Global rank	TC†	% binding at 1uM		Ki (nM)		seletivity (sigma1/sigma2)	SMILES	Total strain (kcal/mol)	Max strain per torsion(kcal/mol)
						sigma2	sigma1	sigma2	sigma1
1	ZINC000450573233	ZINC000450573233	-57.2538	4628	0.323077	0.035685	0.336339	4.3	128	30	C[C@@H](c1ccccc1)[C@@H](O)CN1CCC(c2c[nH]c3ncccc23)CC1	4.14957	1.48333
2	ZINC000895657866	ZINC000895657866	-55.3493	19964	0.310345	0.029741	0.730418	21.4	989.6	46	CC(C)(NCc1ccc2c(c1)OCCO2)[C@H](O)c1ccccc1	3.64885	2.68241
3	ZINC001170548029	ZINC001170548029	-57.1095	5181	0.346939	0.084006	0.784577	22.6	727.2	32	Fc1ccccc1[C@H]1CCN(CC#Cc2cccc(Cl)c2)C1	2.95677	2.88897
4	ZINC000533478938	ZINC000533478938	-55.383	19485	0.301205	0.026559	0.706247	34.5	1470	43	C[C@@H](C(=O)N(C)Cc1cccc(F)c1)N1CC=C(c2c[nH]c3ncccc23)CC1	3.70496	2.26722
5	ZINC000921927365	ZINC000921927365	-59.0067	1007	0.305085	0.125424	0.688535	67.3	1186	18	O[C@@]1(CNCc2cccc3c2OCC3)CCc2ccccc21	1.7229	1.28127
6	ZINC000548355486	ZINC000548355486	-56.6839	7303	0.290323	0.003645	0.0104866	2.4	4.9	2	CC1CCC(O)(CN2CC(Cc3ccc(F)c(F)c3)C2)CC1	4.9263	2.41746
7	ZINC000348332392	ZINC000348332392	-59.0668	949	0.280702	0.051597	-0.0082486	33.7	2.9	0.1	Cc1ccc([C@H]2CCN(CC3(O)CCC3)C2)c(C)c1	4.15728	1.51467
8	ZINC001254761628	ZINC001254761628	-55.5811	16934	0.271429	0.011349	0.113754	4.7	53	11.3	O[C@@H](COCc1ccccc1F)CN1CC(Cc2ccccc2C(F)(F)F)C1	5.53741	2.30316
9	ZINC000544117725	ZINC000544117725	-57.5185	3655	0.276923	0	0.0501311	10	16.25	1.6	Cc1ccc(CCC2CCN(C(=O)CN3C[C@@H]4CC[C@@H](O)[C@H]4C3)CC2)cc1	4.2336	2.13845
10	ZINC000170908795	ZINC000170908795	-55.8418	13862	0.292308	0.008892	0.0477652	6.7	32.7	4.9	N/C(=N\Cc1ccc(F)cc1Br)NCC1CCC1	3.39215	1.68722
11	ZINC001196519317	ZINC001196519317	-56.3006	9771	0.293333	0.012051	0.0112539	2.4	13.4	5.6	CC(C)CCO[C@@H]1CCN(C[C@H]2CC3(CO2)CCCCC3)C1	4.41218	1.65491
12	ZINC000656714762	ZINC000656714762	-58.681	1325	0.257576	0.092898	-0.00166252	67.8	4.6	0.1	Cc1ccc(CC2CN(CC3(O)CCSCC3)C2)cc1	7.03415	2.34797
13	ZINC001237901728	ZINC001237901728	-56.0317	12026	0.301587	0.045162	-0.00760917	27	1.6	0.1	Fc1c(Cl)c(Br)ccc1CN1CCN(C[C@@H]2CCCO2)CC1	4.62986	1.39438
14	ZINC001460312963	ZINC001460312963	-55.9885	12409	0.287879	0.080262	-0.00741737	5.2	1.7	0.3	CC[C@@H](CO)N1CCC(CCc2ccc(F)cc2F)CC1	5.58604	2.49109
15	ZINC000188287346	ZINC000188287346	-59.5621	600	0.322034	0.009403	0.0810794	NT	NT	ND	C[C@H](Cn1ncc2ccccc2c1=O)N[C@H]1CC[C@H](Cc2ccccc2)C1	6.67074	2.13896
16	ZINC000657922756	ZINC000657922756	-55.2609	21317	0.25	0.0168513	0.231856	NT	NT	ND	C[C@@H](Cc1ccc2c(c1)CCCC2)N[C@H]1CCN(C2CCOCC2)C1=O	6.67374	2.59317
17	ZINC001308961074	ZINC001308961074	-56.7604	6906	0.3125	0.0243527	0.0296694	NT	NT	ND	FC(F)(F)c1ccnc([C@H]2CCN(CCCc3ccc4c(c3)CCO4)C2)n1	3.71491	2.12868
18	ZINC000792998860	ZINC000792998860	-56.6559	7432	0.34375	0.037908	0.341454	NT	NT	ND	O=[N+]([O-])c1cccc([C@H](O)CN2CC(Cc3cccc(C(F)(F)F)c3)C2)c1	3.78262	2.41841
19	ZINC000433044150	ZINC000433044150	-57.6005	3425	0.328125	0.049842	0.0437368	NT	NT	ND	CCc1ccc([C@@H]2CCN(Cc3cc(=O)n4c(C)cccc4n3)C2)cc1	1.8817	1.14603
20	ZINC000897616680	ZINC000897616680	-57.1718	4931	0.296875	0.05148	0.0352964	NT	NT	ND	FC(F)(F)c1ccnc([C@H]2CCN(C[C@@H]3C[C@H]3c3ccccc3)C2)n1	5.04586	3.07295
21	ZINC000374368469	ZINC000374368469	-55.4343	18778	0.236842	0.057564	0.0902232	NT	NT	ND	Cc1cc(C)cc(NC(=O)[C@H](C)N2CC[C@@H](C3CCOCC3)C2)c1	4.29869	1.8809
22	ZINC000262856881	ZINC000262856881	-55.5914	16724	0.295082	0.063999	0.0561417	NT	NT	ND	C=C(C)CN/C(N)=N/[C@H]1C[C@H](c2cccc(F)c2)C1	1.29419	0.58786
23	ZINC000430988927	ZINC000430988927	-57.1047	5206	0.347826	0.0748017	0.0351045	NT	NT	ND	O=C(C[C@@H]1CCCN1CCOc1cccc([N+](=O)[O-])c1)c1cccs1	7.30548	2.31332
24	ZINC000269280100	ZINC000269280100	-56.0184	12047	0.265625	0.11115	0.411407	NT	NT	ND	N/C(=N\Cc1cccc2c1OCCCO2)NC1CCCC1	1.68857	0.705175
25	ZINC000353995714	ZINC000353995714	-55.2662	21126	0.296875	0.131907	0.0727668	NT	NT	ND	Cc1cc(CN2CC[C@H]2Cc2ccccc2)ccc1-n1cncn1	7.28833	2.30306
26	ZINC000657934399	ZINC000657934399	-65.0514	5	0.303571	0.132541	0.090351	NT	NT	ND	C[C@H](Cn1ncc2ccccc2c1=O)N[C@@H](C)Cc1ccc2c(c1)CCCC2	6.47067	2.13999
27	ZINC001168222793	ZINC001168222793	-55.2361	21642	0.338462	0.13689	0.182365	NT	NT	ND	Cc1cc(C)cc(C2=CCN(CCC(=O)N3CCc4ccccc43)CC2)c1	4.43196	2.11641
28	ZINC000507809396	ZINC000507809396	-55.4686	18248	0.311475	0.139725	-0.00115096	NT	NT	ND	CC[C@H]1CN(Cc2ccc(-c3ccccc3)cc2F)C[C@H]1O	3.48558	1.46228
29	ZINC000398583627	ZINC000398583627	-55.2441	21569	0.333333	0.145665	0.224055	NT	NT	ND	COc1ccc2cc(CN[C@](C)(CO)C(C)C)ccc2c1	1.58299	0.8407
30	ZINC000549824186	ZINC000549824186	-58.0887	2227	0.338028	0.19963	0.00645823	NT	NT	ND	FC(F)(F)c1cccc([C@@]2(F)CCN(C[C@@H]3CCSC3)C2)c1	3.64824	1.59028
31	ZINC000483826940	ZINC000483826940	-55.4777	18107	0.236842	0.225342	NT	NT	NT	ND	C[C@H](NC[C@H](CO)Cc1c(F)cccc1Cl)c1ccco1	4.32479	1.50314
32	ZINC000886836194	ZINC000886836194	-56.0198	12106	0.253333	0.241488	NT	NT	NT	ND	Cc1cc(C(=O)CN2CC[C@@H]([C@H]3CCCO3)C2)c(C)n1C1CC1	5.19797	2.33278
33	ZINC000453142034	ZINC000453142034	-55.6541	15947	0.326923	0.249128	NT	NT	NT	ND	C[C@H](CCCc1cccnc1)N[C@@H](C)Cn1cccn1	8.55916	2.12876
34	ZINC000925887162	ZINC000925887162	-55.719	15238	0.323529	0.273798	NT	NT	NT	ND	CCn1ncc2c1CCC[C@@H]2N[C@@H](C)Cc1ccccn1	4.89488	2.12321
35	ZINC000933438523	ZINC000933438523	-55.8965	13298	0.211765	0.281151	NT	NT	NT	ND	Cc1csc2nc(CN[C@](C)(CO)Cc3ccc(F)cc3)cc(=O)n12	2.80634	1.84995
36	ZINC000249076038	ZINC000249076038	-57.7884	2914	0.288136	0.305136	NT	NT	NT	ND	O[C@]1(CN[C@@H]2CC[C@@H](Cc3ccccc3)C2)CCSC1	3.34604	1.72516
37	ZINC000621267824	ZINC000621267824	-58.9423	1065	0.25	0.334269	NT	NT	NT	ND	CC(C)(CO)N1CCN(c2nc3c(cccc3Br)s2)CC1	3.86467	2.28548
38	ZINC000934332177	ZINC000934332177	-57.4436	3965	0.283582	0.339768	NT	NT	NT	ND	O[C@H](CN1CC[C@@H](Cc2nccs2)C1)c1c(F)cccc1F	2.65754	1.19647
39	ZINC000567338231	ZINC000567338231	-55.6541	15966	0.243243	0.347022	NT	NT	NT	ND	Cc1csc2nc(CN[C@H]3C[C@H](OCc4ccccc4)C3(C)C)cc(=O)n12	3.92345	1.31901
40	ZINC000894101819	ZINC000894101819	-58.113	2199	0.24	0.349947	NT	NT	NT	ND	CC[C@@H](C)N1CCN(c2nc(N)nc(C(F)(F)C(F)(F)F)n2)CC1	1.9057	1.07736
41	ZINC000452107481	ZINC000452107481	-55.2477	21450	0.216667	0.369135	NT	NT	NT	ND	CC(C)N1CC[C@@H](N(C)S(=O)(=O)c2c(F)c(F)cc(F)c2F)C1	3.16178	2.28694
42	ZINC000452023252	ZINC000452023252	-56.3634	9264	0.275862	0.375219	NT	NT	NT	ND	O=C([C@@H]1C[C@H]1C(F)(F)F)N(CCN1CCCCCC1)C1CCC1	9.13023	3.5479
43	ZINC000801571276	ZINC000801571276	-55.9065	13158	0.305085	0.37557	NT	NT	NT	ND	O[C@H](CN[C@@H]1CCc2ccccc2OC1)COc1c(Cl)cccc1Cl	6.4551	2.20191
44	ZINC000448446275	ZINC000448446275	-57.1052	5160	0.333333	0.387036	NT	NT	NT	ND	CCC(CC)n1ccc(CN2CC=C(c3ccc(O)cc3)CC2)n1	4.6251	1.56876
45	ZINC000662345330	ZINC000662345330	-55.8581	13700	0.285714	0.423423	NT	NT	NT	ND	CN(CC(=O)Nc1c(Cl)cccc1Cl)C[C@@H]1CC1(C)C	5.85661	2.3615
46	ZINC000352856249	ZINC000352856249	-56.6547	7458	0.327586	0.429975	NT	NT	NT	ND	N#Cc1ccc(N2CCN(C[C@H](O)CC3CCCC3)CC2)c(F)c1	3.27809	1.22985
47	ZINC000846106280	ZINC000846106280	-56.5916	7851	0.225352	0.435825	NT	NT	NT	ND	Fc1ccc(C2OCCO2)c(Cl)c1CNC1CC2(CCC2)C1	3.56032	1.46224
48	ZINC000262658947	ZINC000262658947	-57.7151	3100	0.283582	0.454195	NT	NT	NT	ND	COc1ccc(Br)cc1C/N=C1/NC[C@@H](C)N1	1.36187	0.818987
49	ZINC000924470947	ZINC000924470947	-57.3539	4268	0.283333	0.45457	NT	NT	NT	ND	CC(C)(CN1C(=O)N2CCC[C@@H]3C[C@@]32C1=O)N1CCc2ccccc2C1	1.59833	1.23643
50	ZINC000595632104	ZINC000595632104	-56.6765	7309	0.328358	0.456651	NT	NT	NT	ND	N#Cc1sccc1N1CCN(CCCCCn2cccn2)CC1	6.74449	3.20291
51	ZINC000472356611	ZINC000472356611	-57.3623	4219	0.309859	0.459342	NT	NT	NT	ND	C[C@@H]1[C@H](Cc2ccccc2)CCN1Cc1cc(=O)n2cc(Cl)ccc2n1	1.12002	0.576794
52	ZINC000574654702	ZINC000574654702	-55.6208	16393	0.279412	0.484311	NT	NT	NT	ND	CCc1nc2cc(CN[C@@H](C)CC(=O)N3CCCCCC3)ccc2n1C1CC1	6.11017	1.51478
53	ZINC000656508398	ZINC000656508398	-57.1959	4809	0.293103	0.559378	NT	NT	NT	ND	OC[C@]1(CNC2=NCCCN2)CCc2ccccc21	3.9243	1.64814
54	ZINC000296612417	ZINC000296612417	-56.7606	6865	0.308642	0.592393	NT	NT	NT	ND	C[C@H](COc1ccc(Cl)c(Cl)c1)N[C@@H](C)Cn1cncn1	11.9563	2.31335
55	ZINC000336580930	ZINC000336580930	-55.2703	21121	0.310345	0.609337	NT	NT	NT	ND	O=C1NCCC[C@@H]1N1CC[C@@H](c2cccc(Cl)c2)C1	1.58932	1.21807
56	ZINC000176995469	ZINC000176995469	-55.9029	13220	0.306452	0.614368	NT	NT	NT	ND	C[C@H](c1ccccn1)N1CC=C(c2ccc(O)cc2)CC1	2.97724	1.56864
57	ZINC000571080072	ZINC000571080072	-60.0452	410	0.295775	0.640108	NT	NT	NT	ND	C[C@H](C(=O)NCc1ccc(Cl)cc1)N1CC[C@@H](c2cccnc2)C1	3.46181	2.12014
58	ZINC000133991118	ZINC000133991118	-55.2428	21534	0.333333	0.653914	NT	NT	NT	ND	C[C@@H](Cn1cc(Br)cn1)NCCOc1ccc2c(c1)OCO2	2.80207	1.51525
59	ZINC000473272986	ZINC000473272986	-56.228	10254	0.292308	0.66538	NT	NT	NT	ND	COc1ccnc(N2CCN([C@H](C)CCSc3ccccc3)CC2)n1	7.36802	1.50373
60	ZINC000247015101	ZINC000247015101	-57.446	3921	0.279412	0.729613	NT	NT	NT	ND	O=C1[C@H](N2C[C@@H]3CCC[C@H]3C2)CCN1c1ccccc1Cl	1.54791	1.17298
61	ZINC000131571127	ZINC000131571127	-55.1769	22496	0.215385	0.766033	NT	NT	NT	ND	C[C@H](Cn1cc(Br)cn1)NCc1cn2cc(Cl)ccc2n1	3.79612	2.11218
62	ZINC000407281203	ZINC000407281203	-56.2915	9803	0.257576	0.808237	NT	NT	NT	ND	CCc1cc(NC(=O)[C@@H]2CC[C@H](C3CC3)N2)ccc1C	3.35998	1.57698
63	ZINC000528002641	ZINC000528002641	-55.4202	18937	0.231884	0.840148	NT	NT	NT	ND	C[C@@H](N[C@H]1Cc2ccccc2NC1=O)[C@@H]1C[C@H]1c1ccc(Cl)s1	5.26662	1.9386
64	ZINC000248559983	ZINC000248559983	-56.912	6084	0.306452	0.87364	NT	NT	NT	ND	CN(C[C@@H](O)CCc1ccccc1)[C@H]1CCN(c2ccccc2F)C1=O	3.89092	1.50318
65	ZINC000093013680	ZINC000093013680	-55.8826	13429	0.327586	0.895721	NT	NT	NT	ND	c1sc(CN2CCC3(C2)OCCO3)cc1-c1ccccc1	2.95812	1.21035
66	ZINC000769519341	ZINC000769519341	-55.2794	21009	0.315789	0.916957	NT	NT	NT	ND	C[C@H](CCN1C(=O)c2ccccc2C1=O)NC[C@@H](O)c1c(F)cccc1F	5.85558	1.82557
67	ZINC000911907143	ZINC000911907143	-56.1434	11006	0.305556	0.931204	NT	NT	NT	ND	Cc1ccc(NC(=O)C23CCC(CC2)N3)cc1[N+](=O)[O-]	2.89391	1.47067
68	ZINC000893277758	ZINC000893277758	-55.3003	20724	0.272727	0.951328	NT	NT	NT	ND	Cc1cccc2sc(N3CCN(CCO)[C@H](C)C3)nc21	2.34696	2.28567
69	ZINC000892713700	ZINC000892713700	-57.0959	5220	0.222222	0.994735	NT	NT	NT	ND	CC[C@H](CO)N1CCN(c2cc(Cl)c3cnn(C)c3n2)CC1	2.75625	1.22787
70	ZINC000435004139	ZINC000435004139	-55.9088	13117	0.323944	0.996139	NT	NT	NT	ND	CN(C(=O)CN1CCC(c2cnc[nH]2)CC1)C(c1ccccc1)c1ccccc1	5.49109	1.83314
71	ZINC000659267272	ZINC000659267272	-56.4653	8587	0.246914	1.01041	NT	NT	NT	ND	CCOc1cc2c(cc1NC(=O)C[C@@H]1NCc3ccccc31)O[C@@H](C)C2	2.20508	0.891741
72	ZINC000820594289	ZINC000820594289	-55.6042	16659	0.206349	1.03849	NT	NT	NT	ND	C[C@H]1[C@H](N(C)C)CCN1c1snc(Cl)c1C#N	3.51485	3.2499
73	ZINC000296435291	ZINC000296435291	-55.2544	21422	0.246377	1.06517	NT	NT	NT	ND	CS[C@H]1CCN([C@H](C)c2nc(-c3ccccc3C)no2)C1	3.30277	2.04551
74	ZINC000665143541	ZINC000665143541	-55.3437	20094	0.211538	1.08237	NT	NT	NT	ND	CN(C)Cc1ccc(-c2cscc2CCO)cc1F	4.44312	2.85138
75	ZINC000777733869	ZINC000777733869	-57.032	5539	0.333333	1.08377	NT	NT	NT	ND	O=C1NCCC[C@@H]1N1CC[C@@](O)(c2ccc(F)cc2)C1	2.23363	1.21763
76	ZINC000369205980	ZINC000369205980	-55.5873	16735	0.311475	1.11829	NT	NT	NT	ND	N#CC1(c2ccccn2)CCN([C@@H]2Cc3ccccc3[C@@H]2O)CC1	0.352813	0.225823
77	ZINC000287374567	ZINC000287374567	-55.6344	16207	0.313725	1.13537	NT	NT	NT	ND	O[C@H]1c2ccccc2C[C@H]1N1Cc2cccc(Cl)c2C1	0.598868	0.598868
78	ZINC000681377109	ZINC000681377109	-55.5095	17760	0.314815	1.13853	NT	NT	NT	ND	Fc1cc(Br)cnc1N1CCN(CCc2cccs2)CC1	2.51745	1.33009
79	ZINC001525937517	ZINC001525937517	-57.4105	4069	0.348485	1.16953	NT	NT	NT	ND	O=C(OC[C@@H]1CCN1Cc1ccccc1)c1nccc2occc21	13.3905	4.62055
80	ZINC000129576345	Z1441728492	-32.6421	57528707	0.305085	0.141603	0.242292	NT	NT	ND	COc1ccccc1O[C@H](C)CN[C@@H](C)c1ccccc1OC	7.08994	3.01981
81	ZINC000550829396	Z1930703559	-18.997	320047299	0.19403	0.195711	0.285717	NT	NT	ND	Cn1nccc1[C@@H]1CCC[C@@H](N[C@H]2CC3CCC2CC3)C1	3.31831	1.22715
82	ZINC000182842742	Z4426080539	-33.4673	50889836	0.304348	0.361213	0.666566	NT	NT	ND	Cc1ccc([N+](=O)[O-])cc1[C@H](C)N1C[C@H]2CCC[C@@H]2C1	0.382994	0.290941
83	ZINC000658086473	Z2591574640	-42.0059	10446238	0.305085	0.423053	0.549221	NT	NT	ND	COc1ccc([C@@H](C)N[C@H](CO)C2CCC2)cc1Br	3.4113	1.68844
84	ZINC000635049325	Z2795651844	-40.636	14542581	0.305085	0.531978	0.0344792	NT	NT	ND	O=C(Nc1cscc1Cl)C(=O)N[C@@H]1CCN(CC2CC2)C1	8.21795	3.23022
85	ZINC000389015736	Z2148995533	-19.0773	318290882	0.298507	0.541113	0.655291	NT	NT	ND	C[C@H](N[C@@H]1CCCc2c3ccccc3[nH]c21)[C@H]1CCCOC1	4.27786	1.84773
86	ZINC001195393353	Z4426350085	-29.5555	91360310	0.341463	0.544619	0.239972	NT	NT	ND	COc1ccc2c(c1)C[C@H](CN1CCCC[C@H]1CCC(=O)OC(C)(C)C)O2	6.06151	1.85601
87	ZINC000582751592	Z2878122556	-44.9123	4410937	0.264706	0.723827	0.707333	NT	NT	ND	O[C@@H]1CC[C@@H]2CN(Cc3cccc4c[nH]nc43)C[C@H]12	1.15672	1.14624
88	ZINC001420054689	Z4426350795	-34.3804	44501635	0.28125	0.784617	0.545582	NT	NT	ND	COCC1(C(=O)N2CCC[C@@H](N(C)CC[C@H](C)F)C2)CC1	11.9621	3.20539
89	ZINC000649929688	Z2277411173	-34.0964	46367996	0.231884	0.964514	0.714618	NT	NT	ND	O=C(CN1CCC[C@@H]1[C@@H]1CCC[C@H]1O)N1CCOC[C@H]1C1CC1	6.52375	2.31386
90	ZINC000245533477	Z1579249600	-21.7776	254547099	0.207547	0.984899	0.708324	NT	NT	ND	CC[C@H](C)CNC[C@H]1CCC[C@H]1NS(C)(=O)=O	4.27963	1.67129
91	ZINC001087646081	Z4426350008	-27.9351	116424252	0.323529	0.993676	0.0878403	NT	NT	ND	CC[C@@H]1[C@@H](NC(=O)Cc2ccc(C)cc2)CCN1C[C@@H]1CCOC1	5.24814	1.63985
92	ZINC000341348768	Z2043627283	-35.7842	35881111	0.163934	1.03408	0.807426	NT	NT	ND	Cc1cnc(CN[C@@H](CO)CCC(C)(C)C)n1C	4.2067	1.51565
93	ZINC000662800454	Z2606802689	-32.4526	59205541	0.276923	1.05587	0.868748	NT	NT	ND	COc1cc(NC(=O)CC2(N)CC2)cc(OC)c1Br	6.10654	2.32257
94	ZINC000261774189	Z2441223595	-23.4364	213383997	0.327273	1.08293	0.53895	NT	NT	ND	C=CCOCC(=O)N(CCN)CCc1ccccc1	6.15626	2.12675
95	ZINC000543048256	Z1646405102	-37.3364	27800769	0.333333	1.08996	0.592315	NT	NT	ND	COc1cccc2ncnc(N3CCN(CC4CCOCC4)CC3)c21	3.76416	1.79315
96	ZINC001078073018	Z4426079310	-27.4217	125865808	0.253333	1.11245	0.834282	NT	NT	ND	C[C@@H](CCNC(=O)C1(CN(C)C)CC1)NC(=O)c1ncccc1O	6.59844	1.92119
97	ZINC000948091407	Z1212563833	-44.7175	4707826	0.291667	1.12158	0.889297	NT	NT	ND	CCN1CC[C@@H](NC(=O)c2ccnc(-n3cncn3)c2)C[C@@H]1C	2.2713	1.06334
98	ZINC001655120594	Z3316921677	-36.2723	33238652	0.267606	1.12368	0.66821	NT	NT	ND	C[C@H](OCCCNC(=O)CN1C[C@@H](C)OCC[C@H]1C)c1ccccc1	4.96161	1.62487
99	ZINC000996610565	Z4426079301	-28.9786	99710181	0.235294	1.13949	0.996016	NT	NT	ND	CC(C)NC1CCN(C(=O)Cn2cnc(C(N)=O)n2)CC1	5.24389	2.12514
100	ZINC000853031922	Z2609960404	-38.7436	21590638	0.316667	1.15319	0.333112	NT	NT	ND	Fc1ccc(NC(=S)NC2CCN([C@H]3CCOC3)CC2)cc1	2.391	1.04347
101	ZINC001035320653	Z4426348660	-11.3332	424937722	0.341463	1.18833	0.215774	NT	NT	ND	CCc1ocnc1C(=O)NC[C@H]1CN(C[C@@H](C)CC)CCO1	3.95776	1.8364
102	ZINC000369129048	Z1950347921	-26.3464	146706740	0.208333	1.19818	0.94929	NT	NT	ND	Cn1cc(-c2ncc(CN(CC3CC3)C[C@H]3CN(C)CCO3)cn2)cn1	8.96994	3.34261
103	ZINC000416873685	Z2360574056	-23.2423	218337454	0.264706	1.2695	0.907185	NT	NT	ND	C[C@H](N)[C@@H]1CCCCN1C(=O)NCc1cn2ccccc2n1	3.23026	2.1365
104	ZINC000906421824	Z4096780736	-17.7731	345293233	0.222222	1.27302	0.865762	NT	NT	ND	C[C@@H]1CN(C(=O)C2CN(C)CCN(C)C2)CC(C)(C)O1	2.99021	2.12723
105	ZINC000661577595	Z2603376298	-52.5031	129452	0.333333	0.0640714	NT	1.757	NT	ND	C(CN1CC[C@@H](C2CCCCC2)C1)C1CCOCC1	2.22162	1.79249
106	ZINC000440321606	Z1375037087	-61.1158	152	0.271429	0.118983	NT	4.15	NT	ND	CCOC(=O)[C@@H](CC)N1CCN(C2CCC(C(C)C)CC2)CC1	4.70464	1.50783
107	ZINC000878406056	Z2835144760	-59.57	596	0.227273	0.117812	NT	7.656	NT	ND	CC(C)(C)[C@@H]1CCN(C[C@@H](O)CC2(O)CCCCC2)C1	3.90131	1.84934
108	ZINC001460371878	Z4670289310	-63.2999	19	0.283019	0.109087	NT	7.924	NT	ND	O[C@@H](CN1CC[C@@H](C2CCCCC2)C1)CC1(O)CCCCC1	6.21966	1.84964
109	ZINC000409447221	Z1653378877	-55.0031	25628	0.287879	0.0973236	NT	8.847	NT	ND	CC(C)(C)[C@@H]1CCN(C[C@@H](O)COCc2ccccc2F)C1	4.59765	1.46223
110	ZINC000559413424	Z2219774495	-59.3977	715	0.288136	0.118894	NT	10.49	NT	ND	Cc1cccc(C)c1OC[C@H](O)CN1CC[C@@H](CC2CC2)C1	6.69997	2.28082
111	ZINC000191344346	Z1828654465	-52.5032	129135	0.339623	0.0870701	NT	11.75	NT	ND	O=C(CC1CCCC1)NC1CCN(C[C@H](O)C2CCCCC2)CC1	5.58092	1.65056
112	ZINC000480785335	Z1958788373	-52.5042	129321	0.328358	0.0976158	NT	12.87	NT	ND	CN(C[C@]1(O)CCN(Cc2ccccc2)C1)C(=O)c1ccc(F)c2ccccc12	7.20832	2.12656
113	ZINC001376084945	Z4670289377	-55.0015	25751	0.304348	0.097166	NT	13.52	NT	ND	C[C@H](C(=O)NC[C@]1(O)CCN(CCC2CCCC2)C1)c1ccccc1	3.45921	1.72246
114	ZINC000605902355	Z1236175503	-61.3927	118	0.338028	0.115137	NT	13.73	NT	ND	O[C@@H](COCc1ccccc1Cl)CN1CC[C@H](Cc2ccc(F)cc2)C1	3.82867	1.66015
115	ZINC000872109019	Z2790627889	-55.0033	25696	0.293103	0.11618	NT	14.71	NT	ND	c1ccc(N2CCC(NC[C@@H]3C[C@H]4CCC[C@@H]4O3)CC2)cc1	2.77728	1.19337
116	ZINC000131303503	Z1500985969	-55.002	25593	0.333333	0.106549	NT	14.74	NT	ND	CC(C)c1ccc(NC(=O)C(=O)NC2CCC(N3CCC(C)CC3)CC2)cc1	4.12471	1.83906
117	ZINC000960887654	Z4670289710	-47.5042	1644724	0.264706	0.129361	NT	18.11	NT	ND	CCc1nnsc1C(=O)N[C@@H]1[C@H]2CN(CC3CCCCCC3)C[C@H]21	5.34866	2.39013
118	ZINC000301801549	Z1510214726	-59.5747	595	0.315789	0.0692207	NT	19.64	NT	ND	c1ccc(CSc2cncc(N3CCC[C@H](N4CCCC4)CC3)n2)cc1	2.94605	1.29785
119	ZINC000941634458	Z4670319230	-50.0039	513561	0.265625	0.126695	NT	20.26	NT	ND	C[C@@H](C(=O)N1CCN(C2CN(CC3CC(C)C3)C2)CC1)C1CCCC1	6.95929	2.1513
120	ZINC000481989921	Z1732943230	-52.5035	129323	0.315789	0.117409	NT	21.59	NT	ND	Cc1cc2[nH]c(CN3CCC[C@H](N4CCCC4)CC3)cc2c(C)c1	1.56196	0.840526
121	ZINC000878084395	Z2833839133	-61.0733	161	0.272727	0.276764	NT	NT	NT	ND	O[C@@H](CN1CC[C@@H](c2ccccc2F)C1)CC1(O)CCCCC1	7.20259	2.32861
122	ZINC000849049798	Z2518536383	-61.2118	140	0.230769	0.0869565	NT	NT	NT	ND	C[C@H]1CN/C(=N/CCCc2c(Cl)cccc2Cl)N1	5.06293	2.28936
123	ZINC000076836015	Z645938956	-61.0501	163	0.296296	0.604623	NT	NT	NT	ND	c1ccc2c(c1)nc(-c1cccnc1)nc2N1CCC[C@H](N2CCCC2)C1	1.32725	1.19332
124	ZINC000766031584	Z1731397861	-61.4369	112	0.326923	0.632198	NT	NT	NT	ND	Cc1ccc2c(c1)CC[C@H]2N[C@@H](CO)Cc1ccccc1	4.48734	1.51542
125	ZINC000684607185	Z1959404885	-62.3989	50	0.34	0.173358	NT	NT	NT	ND	CC(C)C1CN(C[C@@H](O)COC(c2ccccc2)c2ccccc2)C1	5.62686	2.3142
126	ZINC000683721842	Z1898133468	-61.3227	122	0.301887	0.998378	NT	NT	NT	ND	Clc1ccccc1Cn1cc(CNc2nc3ccccc3[nH]2)cn1	2.65895	1.46225
127	ZINC000676461131	Z1473280384	-62.7795	32	0.327273	0.638483	NT	NT	NT	ND	Clc1ccccc1Cn1cc(CN2CCC[C@@H]2c2ccc[nH]2)cn1	2.74898	1.28124
128	ZINC000668631550	Z2629138429	-62.6708	38	0.274194	0.583942	NT	NT	NT	ND	Cc1ccccc1-n1cc(CN2CCC[C@@H]([C@H]3CCCCO3)C2)nn1	3.00494	1.26025
129	ZINC000662335416	Z2605531820	-60.9487	180	0.283582	1.21477	NT	NT	NT	ND	O=C(CN1CC2CC1(c1ccccc1)C2)NC[C@@H]1CCCO1	4.25693	1.88089
130	ZINC000656499190	Z2312321347	-62.1527	60	0.320513	0.715244	NT	NT	NT	ND	Cc1cc(F)c(CN[C@@H]2CCN(c3ccccc3C(N)=O)C2)c(Cl)c1	3.90547	2.57153
131	ZINC000617924178	Z2644404614	-62.666	37	0.271429	1.2555	NT	NT	NT	ND	CCN(C(=O)c1cccc(C(F)(F)F)n1)[C@H]1CCN(CC)C1	4.40595	2.21179
132	ZINC000609803478	Z1225724640	-63.5281	14	0.323529	0.498121	NT	NT	NT	ND	COC(=O)[C@H](NCC(C)(C)N1CCc2ccccc2C1)c1ccccc1	4.90305	2.12109
133	ZINC000595790972	Z2604189896	-62.4397	47	0.317073	0.961084	NT	NT	NT	ND	Cc1cc([N+](=O)[O-])ccc1NC(=O)CN1CCC[C@@H]([C@@H]2CCCCO2)C1	4.52033	1.87992
134	ZINC000577603040	Z2406352462	-60.8877	189	0.339623	0.616747	NT	NT	NT	ND	C[C@H](Cc1ccccc1Br)NCC1(O)CCC1	4.85098	1.75445
135	ZINC000518003593	Z1141963200	-61.4182	114	0.290909	0.797571	NT	NT	NT	ND	Cc1ccccc1[C@H](OC[C@H](O)CN1Cc2ccccc2C1)c1ccccc1	2.76666	2.0489
136	ZINC000512182007	Z2070843529	-62.0928	63	0.316667	0.316464	NT	NT	NT	ND	C[C@H]1C[C@H](N2CCCC2)CN1CC(=O)N(Cc1ccccc1)c1ccccc1	5.75327	2.12757
137	ZINC000508475661	Z2068702592	-60.9325	184	0.279412	0.385965	NT	NT	NT	ND	Cc1cccc(CNc2nccn2Cc2ccccc2)c1C	3.49655	2.15311
138	ZINC000464767692	Z1289778247	-60.8052	206	0.333333	0.738417	NT	NT	NT	ND	CCN(CC)[C@H]1CCN(CC(=O)N[C@H](c2cccs2)c2ccccc2)C1	4.21476	1.63388
139	ZINC000451319844	Z2277002329	-61.1146	157	0.333333	0.62978	NT	NT	NT	ND	CS[C@@H]1CCN(C[C@@H](O)COC(c2ccc(F)cc2)c2ccc(F)cc2)C1	7.26652	2.04751
140	ZINC000430847713	Z1868664675	-61.9294	74	0.321429	0.673189	NT	NT	NT	ND	CCCN1C(=O)N(CC(C)(C)N2CCc3ccccc3C2)C(=O)[C@H]1CC	6.0865	1.83659
141	ZINC000429522320	Z1865690982	-61.1061	156	0.3125	0.600765	NT	NT	NT	ND	O[C@@H](CN[C@@H](Cc1ccccc1F)c1ccccc1)CN1CCCC1	6.07409	1.9361
142	ZINC000426471156	Z1745777108	-61.1113	155	0.314815	0.362573	NT	NT	NT	ND	O[C@H](COC(c1ccccc1)c1ccccc1)CN1CC[C@@H]2CCC[C@H]21	2.27918	1.37275
143	ZINC000421710406	Z2372600038	-60.8467	197	0.323944	0.818264	NT	NT	NT	ND	CC(C)Sc1ccc([N+](=O)[O-])cc1C(=O)N(C)C[C@H]1CCCN1C	6.61616	1.87
144	ZINC000421710394	Z2372599855	-60.933	183	0.315068	0.945569	NT	NT	NT	ND	CC(C)CSc1ccc([N+](=O)[O-])cc1C(=O)N(C)C[C@H]1CCCN1C	6.20559	1.86999
145	ZINC000421701270	Z2372594890	-61.4557	109	0.333333	0.761359	NT	NT	NT	ND	CCC[C@@H](C(=O)N(C)C[C@H]1CCCN1C)c1ccccc1	4.00732	1.50327
146	ZINC000421699823	Z2372596717	-62.4542	46	0.323944	0.964238	NT	NT	NT	ND	COc1ccc(Oc2ccc([N+](=O)[O-])cc2C(=O)N(C)C[C@H]2CCCN2C)cc1	7.57452	2.44904
147	ZINC000421295130	Z2371762623	-60.8348	198	0.328358	0.7794	NT	NT	NT	ND	CC(C)Sc1c(Cl)cccc1NC(=O)C(=O)N(C)C[C@H]1CCCN1C	6.05892	1.83936
148	ZINC000347007006	Z1817676002	-61.38	119	0.279412	1.08142	NT	NT	NT	ND	COC(=O)[C@@H]1CCN([C@H](C)C(=O)NCc2ccccc2C)[C@@H]1C	5.11133	2.12129
149	ZINC000287581634	Z2102337335	-63.2264	22	0.318182	1.11305	NT	NT	NT	ND	COC(=O)C[C@H]1CCCN1C[C@@H](O)Cc1cccc(Cl)c1	6.19357	2.12871
150	ZINC000263644082	Z1021095168	-64.5119	6	0.318841	0.834277	NT	NT	NT	ND	Cc1ccc(NC(=O)CN2CCC[C@@H](C3OCCO3)C2)cc1Cl	3.48233	1.88134
151	ZINC000248917461	Z1796863649	-61.6944	90	0.283582	1.03076	NT	NT	NT	ND	C[C@H]1CCN(CC#Cc2cccc(Cl)c2)[C@H]1CO	1.63203	1.28114
152	ZINC000247001079	Z1492740593	-63.0625	24	0.304348	0.611916	NT	NT	NT	ND	COC(=O)C[C@H]1CCCN1C[C@@H](O)Cc1ccc(C(F)(F)F)cc1	6.27079	2.12872
153	ZINC000192043753	Z1844778656	-60.8789	190	0.344262	0.529096	NT	NT	NT	ND	O=C1Nc2ccccc2CC[C@H]1N1CC[C@@H](COCc2ccccc2)C1	2.68023	1.21314
154	ZINC001474404955	Z4670289313	-61.556	101	0.263158	0.623132	NT	NT	NT	ND	Cc1cc(C)c(/C=C\CN2CCC[C@@H](O)C2)cc1C	4.257	2.15125
155	ZINC001362573982	Z4670289309	-61.3235	123	0.333333	0.947613	NT	NT	NT	ND	CN(C[C@H]1CCCN1C)C(=O)[C@]1(C)CC(c2ccccc2Cl)=NO1	7.08685	2.66079
156	ZINC001206651458	Z4835694083	-61.464	111	0.233766	1.09042	NT	NT	NT	ND	C[C@@H]1CN([C@H]2CCc3ccccc3NC2=O)C[C@H]1NC(=O)/C=C\C(C)(C)C	3.19288	2.40555
157	ZINC000894427229	Z2973188608	-59.5543	613	0.21875	0.387267	NT	NT	NT	ND	CCC(C)(C)N1CCN(c2nc(N)nc(C(F)(F)C(F)(F)F)n2)CC1	1.86874	1.07737
158	ZINC000858362097	Z2698839159	-59.6771	560	0.26	1.41922	NT	NT	NT	ND	C[C@H](Nc1nc(N)nc(N)n1)c1ccccc1C(F)(F)F	2.99603	1.43863
159	ZINC000830877226	Z2277004157	-59.4693	670	0.292308	0.788118	NT	NT	NT	ND	CS[C@@H]1CCN(C[C@@H](O)c2ccccc2C(F)(F)F)C1	4.39557	1.59652
160	ZINC000819225653	Z2406633347	-59.6529	568	0.28	0.175588	NT	NT	NT	ND	CC(C)(C)OC(=O)N1CCC[C@@](C)(CNC[C@@H](O)c2c(F)cccc2F)C1	4.76315	2.6999
161	ZINC000074484650	Z1204057701	-59.428	694	0.272727	0.868613	NT	NT	NT	ND	C[C@H](C(=O)NCc1cc(Br)cs1)N1CCCCCC1	3.64825	2.12101
162	ZINC000743860012	Z1289706494	-59.4806	662	0.316667	0.236821	NT	NT	NT	ND	O[C@@H](CN1CC[C@@H](CSc2ccccc2)C1)c1c(F)cccc1F	4.61902	1.515
163	ZINC000678272880	Z1569257017	-59.5013	646	0.333333	0.557178	NT	NT	NT	ND	c1ncn(-c2ccccc2CN2CCC[C@H](N3CCCC3)CC2)n1	3.34565	1.46225
164	ZINC000672564445	Z2102941193	-59.6646	564	0.25	0.696675	NT	NT	NT	ND	C[C@H]1[C@H](N2CCCC2)CCN1Cc1cn2cc(Br)ccc2n1	4.82503	2.84581
165	ZINC000611661177	Z1640841632	-59.4275	696	0.327869	0.190553	NT	NT	NT	ND	COC(=O)[C@H](c1cccc(Cl)c1Cl)N1CCC[C@H](N2CCCC2)C1	4.0168	1.79187
166	ZINC000550423124	Z2219778182	-59.6859	553	0.295082	0.435496	NT	NT	NT	ND	Cc1nc(CN2CC[C@H](CC3CC3)C2)nc2ccccc12	3.63973	2.29777
167	ZINC000542825037	Z1636174218	-59.5645	604	0.3	1.0714	NT	NT	NT	ND	C[C@@H](C(=O)NCc1ccccc1Cl)N1CC[C@H](n2ncc3ccccc32)C1	3.43983	2.00343
168	ZINC000534109220	Z1535021318	-59.4725	669	0.289474	0.704107	NT	NT	NT	ND	Cc1cc(NC(=O)[C@H](C)N2CCC[C@@H]([C@H](C)O)C2)ccc1Br	4.64489	1.88081
169	ZINC000516964180	Z4262616955	-59.5874	584	0.318182	0.993027	NT	NT	NT	ND	Cc1cccc(NC(=O)N(C)C[C@H]2CCCN2C)c1C(=O)N1CCCC1	4.86858	1.87032
170	ZINC000513818302	Z1011053398	-59.473	668	0.339623	0.890913	NT	NT	NT	ND	Cc1ccccc1[C@@H]1CCN([C@H](C)C(=O)NCCc2ccccc2)C1	2.45483	2.11987
171	ZINC000508455082	Z2068703050	-59.7305	540	0.339286	0.692982	NT	NT	NT	ND	Brc1ccccc1CNc1nccn1Cc1ccccc1	3.50987	2.15355
172	ZINC000468894194	Z1414793302	-59.5779	587	0.344262	0.354026	NT	NT	NT	ND	CC(C)CO[C@H]1CCN([C@@H](C)C(=O)N(C)Cc2ccc(Br)cc2)C1	4.27296	1.79123
173	ZINC000423867812	Z2439684203	-59.5433	618	0.283333	0.95614	NT	NT	NT	ND	C[C@H](c1ccccc1Br)N(C)C(=O)C[C@@H]1CCCN1	4.5564	1.90782
174	ZINC000412048402	Z2330881599	-59.5091	640	0.315068	0.885645	NT	NT	NT	ND	C[C@H](C(=O)NCc1ccc(F)cc1)N1C[C@@H]2CC[C@H](O)C[C@@H]2C1	3.29447	2.12127
175	ZINC000358253868	Z1687405419	-59.533	623	0.287879	0.520918	NT	NT	NT	ND	Cc1ccc([C@H](NC[C@@]2(O)CCN(C)C2)c2ccccc2)cc1	2.34479	0.743867
176	ZINC000186482223	Z1745468890	-59.4577	674	0.328767	0.953418	NT	NT	NT	ND	N#Cc1ccccc1NC(=O)CCN1CCC(O)(c2c(F)cccc2F)CC1	4.86448	1.44785
177	ZINC001580410121	Z3099816607	-59.5018	650	0.328125	1.2213	NT	NT	NT	ND	N[C@H](Cc1ccccn1)C(=O)NCc1ccccc1C(F)(F)F	6.01256	2.12306
178	ZINC001320149247	Z1675645742	-59.4484	686	0.311475	0.147075	NT	NT	NT	ND	OC1(CN2CC(Cc3ccccc3C(F)(F)F)C2)CCC1	5.38737	2.30337
179	ZINC000120571916	Z1245068947	-59.4246	700	0.322581	0.176597	NT	NT	NT	ND	O=C(Nc1cccc(OC(F)(F)F)c1)C(=O)N1CCC[C@@H](N2CCCC2)CC1	7.82393	2.89722
180	ZINC001109713565	Z4670289335	-59.5208	637	0.273973	0.287476	NT	NT	NT	ND	C[C@H](C(=O)N[C@H]1C[C@H]2CC[C@@H]1N2CCOCC1CC1)c1cccs1	6.4803	2.31796
181	ZINC000894429059	Z2973188617	-54.9982	25702	0.245283	0.336172	NT	NT	NT	ND	CCC(C)(C)N1CCN(c2cc(C(F)F)ncn2)CC1	1.88036	1.16181
182	ZINC000886762228	Z2863431531	-54.9963	25699	0.290323	1.09813	NT	NT	NT	ND	C=CCC1(O)CCN([C@H](C)C(=O)N[C@@H](C)c2ccc(Cl)cc2)CC1	3.37518	1.22594
183	ZINC000843092160	Z2444981000	-55.0041	25693	0.258065	0.162373	NT	NT	NT	ND	OC[C@@H](CNC[C@H](O)c1ccc(F)c(Br)c1)CC1CCCC1	5.79648	1.83615
184	ZINC000825615260	Z2268071152	-54.9944	25873	0.338462	1.04461	NT	NT	NT	ND	O=C([C@H](O)c1cccc([N+](=O)[O-])c1)N1CC[C@H](N2CCCC2)C1	2.91557	1.90976
185	ZINC000775588849	Z1731557920	-54.9965	25687	0.342857	0.390308	NT	NT	NT	ND	COc1ccc([C@H]2CCN(C[C@@H](O)c3ccc(F)cc3Cl)C2)cc1	3.32222	1.47147
186	ZINC000645238909	Z2219723727	-54.9943	25850	0.320755	0.354536	NT	NT	NT	ND	Clc1ccc(O[C@H]2CCN(C3CCCC3)C2)cc1	5.52487	2.52557
187	ZINC000589606863	Z1070654284	-55.0015	25669	0.33871	0.689211	NT	NT	NT	ND	C[C@H](CN(C)CC(=O)NCc1cccc(Cl)c1)c1ccccc1	6.68075	1.50317
188	ZINC000584028046	Z1823017442	-54.9981	25668	0.28169	0.183843	NT	NT	NT	ND	Fc1cccc(Cl)c1CNC1CCC2(CCCO2)CC1	1.48711	1.46225
189	ZINC000574285278	Z2105779952	-54.9994	25666	0.240506	0.761943	NT	NT	NT	ND	CCc1ccc([C@@H](C)N[C@@H]2CCCN(C(=O)CCC(F)(F)F)C2)s1	7.18397	2.12519
190	ZINC000556573026	Z2047345337	-54.9979	25660	0.256757	0.167472	NT	NT	NT	ND	CN1CC[C@](O)(CN[C@@H](c2sccc2Br)C2CCCCC2)C1	4.40829	1.85026
191	ZINC000532978237	Z1212880913	-54.9991	25652	0.338983	1.18604	NT	NT	NT	ND	COC(=O)c1ccccc1NC(=O)CN1C[C@@H](c2ccccc2)C[C@@H]1C	2.24975	0.91022
192	ZINC000531059007	Z1315510635	-55.0046	25651	0.349206	0.8752	NT	NT	NT	ND	CC1(C)[C@H](NC(=O)[C@]2(O)CCN(Cc3ccccc3)C2)[C@@H]2CCCO[C@@H]21	1.79438	0.894629
193	ZINC000526962900	Z1802193579	-54.999	25649	0.25	0.607459	NT	NT	NT	ND	Cc1cccc(C[C@H](CO)NCc2cnc(C3CCCCC3)s2)c1	4.21447	1.47072
194	ZINC000517634594	Z1679871465	-55.0022	25648	0.276923	0.987404	NT	NT	NT	ND	NC(=O)[C@H](Cc1ccc(Cl)cc1)NCc1cc2ccccc2s1	1.13174	0.529177
195	ZINC000500192494	Z1193391202	-55.0005	25646	0.327586	0.693207	NT	NT	NT	ND	C[C@]1(c2ccccc2)CCCN(CC(=O)N2CCc3ccccc32)C1	4.89208	2.04546
196	ZINC000466933503	Z1408680787	-54.999	25641	0.343284	0.843005	NT	NT	NT	ND	C[C@@H]1CN(C2CC2)C[C@H]1NC(=O)N(Cc1cccc(Br)c1)C1CC1	3.86242	2.23303
197	ZINC000453351921	Z2286568343	-55.0004	25639	0.311688	0.692308	NT	NT	NT	ND	COc1cccnc1CN[C@H](Cc1ccc(C)cc1)C1CC1	5.136	2.32247
198	ZINC000439311985	Z1990441865	-55.0005	25636	0.306452	1.0641	NT	NT	NT	ND	C[C@@H]1C[C@@H](c2ccccc2)CCN1Cc1nc(C2CC2)cs1	1.98156	1.06537
199	ZINC000426526480	Z1745772472	-54.9985	25634	0.338983	0.920153	NT	NT	NT	ND	O=C(CN1CC[C@@H]2CCC[C@@H]21)Nc1cccc(I)c1	4.4804	1.88118
200	ZINC000332414923	Z1151758209	-54.9985	25618	0.35	0.872442	NT	NT	NT	ND	CC(C)CC(=O)N[C@@H](C(=O)N1CCC[C@H](N2CCCC2)C1)c1ccccc1	5.74638	2.13616
201	ZINC000285725404	Z2070851195	-55.0025	25614	0.305556	1.1457	NT	NT	NT	ND	CCc1cccc(C)c1NC(=O)CN1C[C@@H](N2CCCC2)C[C@H]1C	4.37249	1.6339
202	ZINC000246894550	Z1286462398	-54.9963	25607	0.338235	0.726455	NT	NT	NT	ND	CCN(C[C@@H]1CCN(Cc2ccccc2)C1)C(=O)[C@H]1CC(=O)N(C2CCCC2)C1	4.2404	1.80496
203	ZINC000245453841	Z1367354685	-54.9992	25606	0.296875	1.13946	NT	NT	NT	ND	C[C@@H](NC(=O)CNC(=O)CN1CCC[C@H]1C)c1ccc(F)cc1	5.09946	2.12122
204	ZINC000228149300	Z1499116079	-55.0001	25605	0.333333	1.12756	NT	NT	NT	ND	Cc1ccccc1NC(=O)CN1CCC[C@@H]1C[C@H](C)O	4.2187	1.35407
205	ZINC000182372239	Z1612136617	-54.9952	25603	0.269841	0.345523	NT	NT	NT	ND	CCN(CC)[C@H]1CCN(Cc2ncc(Cl)cc2Cl)C1	1.62447	0.822252
206	ZINC000176805277	Z1362216796	-55.0033	25601	0.304348	0.415849	NT	NT	NT	ND	COC(=O)[C@@H](NCC[C@H](C)N(C)Cc1ccccc1)c1cccc(C#N)c1	5.71563	1.88118
207	ZINC001579778746	Z4670319222	-54.9973	25753	0.263889	0.196488	NT	NT	NT	ND	Cc1cccc2c1CCN2C(=O)[C@@H]1CC[C@H]2CCCC[C@@H]2N1	0.864341	0.488809
208	ZINC001156463732	Z3333965222	-55.0044	25728	0.333333	0.325819	NT	NT	NT	ND	C(=C/c1ccccc1)\CNc1ccc2c(n1)CCC2	2.24933	0.913984
209	ZINC000115566238	Z1212900047	-55.0048	25590	0.347826	0.181965	NT	NT	NT	ND	CC(C)OCCN1CCN(C2CCC(C)CC2)CC1	5.07106	1.79131
210	ZINC001096194954	Z4670289375	-55.001	25718	0.285714	1.18186	NT	NT	NT	ND	C[C@H](C(=O)N[C@H]1C[C@H]2CC[C@@H]1N2CCn1cccn1)c1ccccc1F	3.30135	1.1766
211	ZINC001095312060	Z4453148447	-54.9972	25716	0.324675	0.693804	NT	NT	NT	ND	Cc1ccc(CN2[C@@H]3CC[C@H]2[C@@H](NC(=O)c2cn(C)cn2)C3)c(C)c1	4.69059	2.3328
212	ZINC000961091031	Z2432470658	-52.5029	129608	0.246575	0.330286	NT	NT	NT	ND	O=C(C1CCCC1)N1CCC[C@H]([C@@H]2CCN(C/C=C\Cl)C2)C1	2.50564	1.34486
213	ZINC000932649435	Z2954002723	-52.504	129598	0.283784	0.695255	NT	NT	NT	ND	CCOC(=O)[C@@H]1CCN(C[C@@H](O)COc2cccc(C)c2)C1	4.18737	2.07814
214	ZINC000932000298	Z2952842982	-52.5032	129596	0.234375	0.758719	NT	NT	NT	ND	O=C1[C@@H](N2CC[C@@H](C3OCCO3)C2)CCN1c1cccc(Br)c1	1.88818	1.15738
215	ZINC000839577413	Z2329851488	-52.5032	129532	0.25	0.28744	NT	NT	NT	ND	C[C@@H]1CCC[C@H](CCN2CCC([C@H](O)c3ncc[nH]3)CC2)C1	2.74616	1.50288
216	ZINC000809405032	Z2158241671	-52.5034	129522	0.266667	0.993512	NT	NT	NT	ND	Cc1ccc(N2CCN(C(=O)C(=O)N[C@@H]3CN(C4CC4)C[C@@H]3C)CC2)cc1	7.67981	2.15658
217	ZINC000805335094	Z2099860887	-52.5034	129517	0.32	1.3328	NT	NT	NT	ND	COc1ccc(C(=O)N2CC[C@H](N3CCCC3)[C@@H]2C)nc1Cl	6.43053	2.12708
218	ZINC000802379169	Z2021149846	-52.5043	129515	0.267606	0.896594	NT	NT	NT	ND	Cc1ccc(C2=NO[C@@H](CNC(=O)N3CC[C@H](N4CCCC4)C3)C2)cc1C	2.96054	2.07964
219	ZINC000684407814	Z1950677214	-52.5032	129483	0.222222	0.706204	NT	NT	NT	ND	CCN(CC)c1ncc(CN2CC(C(C)C)C2)s1	5.22555	2.29652
220	ZINC000669616349	Z1997384440	-52.5028	129471	0.278689	0.566302	NT	NT	NT	ND	OC[C@H](N[C@H]1Cc2[nH]c3ccccc3c2C1)C1CCCCC1	4.78611	1.84869
221	ZINC000064804934	Z804474412	-52.5041	129057	0.310811	0.850164	NT	NT	NT	ND	CCCn1c(C)cc(/C=C(/C#N)C(=O)NCCN(C)Cc2ccccc2)c1C	4.4597	1.83909
222	ZINC000624110289	Z2699497969	-52.5038	129425	0.164179	0.492754	NT	NT	NT	ND	CC(C)CC[C@@H](CO)N[C@H](C)c1nc2c(s1)CCCC2	5.91864	1.83583
223	ZINC000621202771	Z4106421794	-52.5034	129422	0.295775	0.613527	NT	NT	NT	ND	CCCN1CCC[C@H]1C(=O)NCc1cnccc1C(F)(F)F	4.85378	1.62376
224	ZINC000592403811	Z3209795395	-52.5043	129403	0.346154	1.52684	NT	NT	NT	ND	CC(C)Cc1ccc(C(=O)N2CCN([C@@H]3CCC[C@@H]3O)CC2)cc1	2.52623	1.8703
225	ZINC000574318236	Z2157724660	-52.5045	129394	0.318182	1.00351	NT	NT	NT	ND	C[C@@H]1C[C@H](NC(=O)C(=O)N(C)Cc2c(Cl)cccc2Cl)CN1C1CC1	4.88966	2.18162
226	ZINC000536865847	Z1188052306	-52.5033	129364	0.265625	0.362792	NT	NT	NT	ND	CCc1cc(N2CCC[C@@H](N[C@H](C)c3ccc(OC)c(Cl)c3)C2)ncn1	5.05876	1.22628
227	ZINC000525245955	Z1251593378	-52.5043	129351	0.266667	0.936003	NT	NT	NT	ND	CC[C@@H]1CCC[C@H](NC(=O)[C@H](C)N2CCCCCC2)C1	2.91767	1.6722
228	ZINC000520440291	Z125769190	-52.5046	129349	0.285714	1.02182	NT	NT	NT	ND	COc1cc(Cl)c(C)cc1NC(=O)[C@H](C)N(C)Cc1sccc1C	5.62183	1.81898
229	ZINC000501775665	Z1557138164	-52.5036	129338	0.307692	0.204453	NT	NT	NT	ND	C[C@@H](c1ccc(F)c(F)c1)N(C)C(=O)CN1CC[C@@H](C)[C@@H](C)C1	5.13109	1.8327
230	ZINC000453607577	Z2287450150	-52.5049	129302	0.326923	0.867521	NT	NT	NT	ND	Cc1ccc(C[C@H](CO)NCc2cccc(F)c2)cc1C	2.72525	1.16372
231	ZINC000446751851	Z1782283561	-52.5036	129294	0.3	0.207827	NT	NT	NT	ND	O[C@@H](CN[C@@H](c1ccc(Br)cc1Cl)C1CC1)CN1CCCC1	6.81777	2.32267
232	ZINC000436303801	Z1401051328	-52.5037	129288	0.205882	0.752922	NT	NT	NT	ND	CC(C)N1C[C@H](NC(=O)N[C@@H](C)c2ccc(Br)s2)[C@@H](C)C1	1.46277	0.633494
233	ZINC000410783840	Z2320517885	-52.5035	129267	0.276923	1.03406	NT	NT	NT	ND	CN(Cc1cc(F)cc(F)c1)C(=O)C(=O)N1CC[C@H](N2CC=CC2)C1	4.94362	2.1372
234	ZINC000376738332	Z2002546099	-52.5047	129261	0.267857	0.840024	NT	NT	NT	ND	CC[C@H](c1ccccc1)N1CCC(C#N)(c2ccccn2)CC1	2.37748	1.16337
235	ZINC000375486080	Z1817708188	-52.5036	129258	0.276316	0.486821	NT	NT	NT	ND	C[C@@H](CO)N1CCCN([C@@H](C)C(=O)Nc2cccc(Cl)c2Cl)CC1	5.07202	1.54621
236	ZINC000348635286	Z4670325357	-52.5032	129235	0.293103	1.04722	NT	NT	NT	ND	CN(C/C=C\c1ccc(F)c(F)c1)[C@@H]1COC[C@@H]1O	5.51931	1.561
237	ZINC000295103757	Z2264936388	-52.5029	129201	0.285714	1.14072	NT	NT	NT	ND	CS[C@@H]1CCN(Cc2cnc(C)n2-c2ccccc2)C1	5.42752	2.89572
238	ZINC000261552362	Z2518207693	-52.5042	129156	0.333333	0.560586	NT	NT	NT	ND	C[C@H]1CN/C(=N/Cc2cccc(OCc3ccccc3)c2)N1	0.858868	0.827162
239	ZINC000172648663	ZINC000172648663	-52.5037	129111	0.311688	0.96314	NT	NT	NT	ND	O=C(Nc1ccc2ncsc2c1)C(=O)N1CCCN(C2CCCC2)CC1	4.67835	2.137
240	ZINC000170742095	Z1051811136	-52.5042	129109	0.301587	0.296619	NT	NT	NT	ND	FC(F)(F)c1ccc(-c2nc(CN3CC[C@H](N4CCCC4)C3)cs2)cc1	1.75439	0.711777
241	ZINC001515357045	Z3142060526	-52.5049	129783	0.220588	1.04251	NT	NT	NT	ND	O=C(C[C@]1(O)CCCNC1)Nc1cn2cc(Br)ncc2n1	3.63296	1.84348
242	ZINC001307701283	Z1732470338	-52.503	129771	0.271429	0.624799	NT	NT	NT	ND	CC[C@H]1CCN(CC(=O)Nc2cc(Cl)ccc2C#N)[C@H]1C	4.92829	1.97625
243	ZINC000124982852	Z1562892537	-52.5034	129080	0.319444	0.897477	NT	NT	NT	ND	N#Cc1csc(CN2CCC[C@H]2Cc2ccccc2)c1	1.00538	0.576681
244	ZINC001169307444	Z4670289382	-52.503	129688	0.333333	0.212024	NT	NT	NT	ND	C[C@@H](C(=O)NCc1ccc(Cl)cc1)N1CCC(C(C)(C)C)CC1	4.25124	1.81862
245	ZINC000875242850	Z2809328002	-50.0041	513411	0.3	0.762165	NT	NT	NT	ND	C[C@H]1CCC[C@H](NC(=O)C(=O)N2CCC(N3CCN(C)CC3)CC2)CC1	5.31117	2.12668
246	ZINC000080247921	Z1357258969	-50.0042	511743	0.323077	0.246756	NT	NT	NT	ND	Cc1noc(-c2cccnc2NC2CCC(N3CCCCC3)CC2)n1	5.13675	2.03879
247	ZINC000762555244	Z1686821209	-50.0048	513237	0.266667	0.841038	NT	NT	NT	ND	Cc1nn(Cc2ccc(F)cc2)c(Cl)c1CNC[C@@]1(O)CCN(C)C1	3.37722	1.51461
248	ZINC000073649189	Z268742176	-50.0042	511725	0.328358	0.742092	NT	NT	NT	ND	CC[C@@H](C)NC(=O)[C@@H](C)N1CCC(c2c[nH]c3ccccc32)CC1	3.21124	1.23473
249	ZINC000726467110	Z1021762532	-50.0043	513206	0.296296	0.794607	NT	NT	NT	ND	CCN1CCN(CCNC(=S)N[C@H](C)c2cccs2)CC1	2.81957	0.940035
250	ZINC000685844120	Z2176977027	-50.0043	513192	0.274194	0.512976	NT	NT	NT	ND	Brc1ccccc1-n1cc(CN2CC[C@@H]3CCC[C@@H]32)nn1	3.7149	1.31878
251	ZINC000683045155	Z1846214920	-50.0039	513174	0.236842	1.0807	NT	NT	NT	ND	CC[C@@]1(NCC(=O)Nc2ccc(C)cc2Br)CCOC1	2.23487	1.53474
252	ZINC000657977970	Z2591377436	-50.0045	513090	0.3	0.830918	NT	NT	NT	ND	C[C@H](Cn1cncn1)N[C@@H]1CCN(c2ccccc2C(F)(F)F)C1	7.5743	2.08226
253	ZINC000646273308	Z2439036917	-50.0047	513036	0.302326	1.06522	NT	NT	NT	ND	C[C@@H](Cc1c(Cl)cccc1Cl)NC(=O)c1cn(C[C@@H]2CCCN2)nn1	5.88629	2.11387
254	ZINC000631236280	Z2770318131	-50.0036	512994	0.275862	0.919753	NT	NT	NT	ND	COc1ccccc1C[C@@](C)(CO)NCc1ccc2c(c1)ncn2C	2.74217	1.51498
255	ZINC000608224751	Z1275896696	-50.0039	512943	0.322034	0.756307	NT	NT	NT	ND	CC(C)Cc1ccc(C(=O)Nc2ccc(OCCN3CCN(C)CC3)cc2)cc1	7.54534	2.09186
256	ZINC000586751050	Z1005477330	-50.0043	512900	0.283582	0.982287	NT	NT	NT	ND	C[C@@H](C(=O)NC[C@H](C)N1CCCC1)c1c(Cl)cccc1Cl	2.26077	0.988705
257	ZINC000584233558	Z2453568167	-50.0039	512897	0.338983	0.226785	NT	NT	NT	ND	CC1(C)Cc2cc(C(=O)N3CCC[C@@H](N4CCCC4)CC3)ccc2O1	4.37893	2.12665
258	ZINC000564110976	Z2145852422	-50.0037	512837	0.333333	0.781601	NT	NT	NT	ND	CC1CCC(CNC(=O)C(=O)NC2CCN([C@@H]3CCC[C@@H]3O)CC2)CC1	1.70497	0.61948
259	ZINC000557493019	Z2089300282	-50.0038	512815	0.342857	1.13254	NT	NT	NT	ND	COCCN1CCC[C@@H]1CNC(=O)C(=O)N1CCC[C@@H](C(C)C)CC1	4.47835	1.90183
260	ZINC000533411740	Z1051819646	-50.0049	512762	0.344262	0.796836	NT	NT	NT	ND	C[C@H](C(=O)Nc1ccc(F)cc1Cl)N1CC[C@H](N2CCCC2)C1	4.35756	1.4644
261	ZINC000524392254	Z1203509645	-50.0045	512733	0.328358	0.939196	NT	NT	NT	ND	O=C(Nc1cnc2ccccc2c1)[C@]1(O)CCN(Cc2ccccc2)C1	3.18504	1.0033
262	ZINC000504552433	Z2003650908	-50.0038	512684	0.283333	0.491678	NT	NT	NT	ND	COCCN1CCC(N[C@H]2COc3cc(F)c(Br)cc32)CC1	4.11899	1.23415
263	ZINC000465804078	Z1283002963	-50.0039	512591	0.333333	0.677463	NT	NT	NT	ND	CCN(CC)[C@H]1CCN(C(=O)NCCCc2cccc(Cl)c2)C1	2.1192	1.59079
264	ZINC000413145325	Z2347073394	-50.0043	512422	0.30303	0.628751	NT	NT	NT	ND	CC1CCN(C[C@H](O)CNc2nccc3ccc([N+](=O)[O-])cc32)CC1	3.5392	1.54689
265	ZINC000359009035	Z1639222228	-50.005	512329	0.349206	0.997751	NT	NT	NT	ND	CC(C)N1C[C@H](NC(=O)c2ccn(Cc3ccccc3)c2)[C@@H](C)C1	3.81669	2.21349
266	ZINC000301468116	Z1272628292	-50.0047	512208	0.290909	0.884777	NT	NT	NT	ND	c1ccc(SC[C@@H]2CCN(c3cc(N4CCCCC4)ncn3)C2)cc1	6.38693	1.65728
267	ZINC000289897491	Z2171570653	-50.0042	512172	0.271429	0.509941	NT	NT	NT	ND	C[C@@H]1COCC[C@@H]1NCCc1c[nH]c2cccc(Br)c12	1.75425	1.18973
268	ZINC000286616311	Z2097603634	-50.0039	512160	0.289855	0.749964	NT	NT	NT	ND	COC(=O)c1cccc(S(=O)(=O)N2CC[C@@H](N3CCCC3)[C@@H]2C)c1	4.44447	2.39426
269	ZINC000286502332	Z2071413788	-50.0039	512159	0.333333	1.39123	NT	NT	NT	ND	CNC(=O)CC[C@H]1CCCCN1Cc1cc(-c2ccccc2)on1	3.91584	1.48473
270	ZINC000271284821	Z1559388480	-50.0043	512095	0.283951	0.282833	NT	NT	NT	ND	CCCN(C)C[C@H]1CCN([C@H](C)C(=O)c2c[nH]c3ncccc23)C1	5.75295	1.7463
271	ZINC000265181994	Z1212877902	-50.0046	512072	0.320755	1.02003	NT	NT	NT	ND	COC1CCC(N(C)CC(=O)Nc2ccc3ccccc3c2)CC1	6.45994	1.8189
272	ZINC000247147334	Z1437980050	-50.0042	512040	0.271186	1.03788	NT	NT	NT	ND	CN1CCC[C@@H]2CN(Cn3ccc(-c4ccc(Br)cc4)n3)CC[C@H]21	5.07195	2.3187
273	ZINC000192810020	Z2002269140	-50.004	512009	0.3	0.889566	NT	NT	NT	ND	COc1ccc2ccccc2c1-c1cc(CN2CCN(C[C@@H](C)O)C[C@H]2C)on1	7.22983	2.36345
274	ZINC000155998528	Z1452748512	-50.0045	511894	0.346154	0.309099	NT	NT	NT	ND	CS[C@@H]1CCC[C@H](NC(=O)NC2CCN([C@@H]3CCCC[C@@H]3O)CC2)C1	2.54936	1.19395
275	ZINC000155112667	Z1440398442	-50.0038	511889	0.313725	0.338282	NT	NT	NT	ND	C[C@@H](CN1CCN(C)CC1)N[C@@H](C)c1ccc(-c2ccccc2)o1	5.26818	1.16284
276	ZINC000153400973	Z4855605004	-50.0049	511882	0.30137	0.994152	NT	NT	NT	ND	O=C(CN1CC[C@]2(CCOC2)C1)N[C@@H](Cc1ccccc1)c1ccccc1	3.38565	1.38693
277	ZINC001418905447	Z2227823699	-50.0046	514167	0.25974	1.29531	NT	NT	NT	ND	CC(C)N1CC[C@H](CCNC(=O)c2cc(-c3cccnc3)on2)C1	3.37723	1.59135
278	ZINC000135482356	Z1528618055	-50.0043	511863	0.338983	0.217385	NT	NT	NT	ND	O=C(CCc1cc(Br)ccc1F)N1CC[C@@H](CN2CCCC2)C1	1.83206	1.51479
279	ZINC001033973784	Z4670319237	-50.0042	513673	0.263158	0.432524	NT	NT	NT	ND	CCN(C(=O)c1ccnc(C2CC2)n1)[C@H]1CCN(CC2CCC2)C1	7.00409	1.92031
280	ZINC000981787500	Z4670289712	-47.5046	1644796	0.315789	0.483819	NT	NT	NT	ND	O=C(C1CC2(CCC2)C1)N1CCCN(C[C@@H](O)c2ccccc2)CC1	4.79839	2.13609
281	ZINC000972168981	Z4670319314	-47.5045	1644771	0.223684	0.634053	NT	NT	NT	ND	CN(C[C@H]1CCCCO1)[C@@H]1CCN(C(=O)c2nc(Cl)cs2)C1	3.17142	1.48097
282	ZINC000866213504	Z2771892019	-47.5044	1644195	0.320755	2.03999	NT	NT	NT	ND	CN1CCN(C2CCN(c3nc(N)c4ccccc4n3)CC2)CC1	1.20311	1.17894
283	ZINC000664479370	Z2615347132	-47.5041	1643543	0.271429	1.03041	NT	NT	NT	ND	O=C(N[C@H]1CCOC2(CCC2)C1)N1CCC(N2CC[C@@H](O)C2)CC1	2.32162	2.12713
284	ZINC000575186982	Z1545287634	-47.5046	1642833	0.303797	0.229469	NT	NT	NT	ND	Cc1ccc2c(c1)[C@H](NC(=O)NC[C@@H]1CCN(C(C)C)C1)CCC2	3.1534	1.67105
285	ZINC000556484619	Z2222605980	-47.504	1642692	0.289855	1.11916	NT	NT	NT	ND	CC(C)OCCN1CCC(NC(=O)[C@@H]2CCc3nncn3C2)CC1	4.15442	1.23463
286	ZINC000539406733	Z1592753681	-47.5049	1642577	0.34	0.339718	NT	NT	NT	ND	CCCC1CCC(CN2CCN(CC(=O)N(CC)CC)CC2)CC1	4.54938	1.50246
287	ZINC000529649527	Z2717370444	-47.5044	1642503	0.333333	0.843264	NT	NT	NT	ND	C[C@@H](C(=O)Nc1cccc(C2CCCCC2)c1)N1CCN(C)CC1	2.57906	1.35504
288	ZINC000496403719	Z2407112450	-47.5042	1642306	0.266667	0.923752	NT	NT	NT	ND	CN(C[C@H](O)CN[C@@H]1C[C@H]2CCCCN2C1=O)C(=O)OC(C)(C)C	5.89946	2.13653
289	ZINC000454705882	Z2291985817	-47.5044	1642082	0.32	0.876068	NT	NT	NT	ND	CN1CC[C@@H](CNC(=O)Nc2cc(F)ccc2Oc2ccccc2)C1	6.99651	2.38526
290	ZINC000452100574	Z2280166407	-47.5048	1642051	0.211268	0.733468	NT	NT	NT	ND	CC(C)N1CC[C@H](N(C)S(=O)(=O)C[C@H]2CCCCC2(F)F)C1	5.49148	2.62261
291	ZINC000450551910	Z2272953139	-47.5041	1642031	0.327869	0.159919	NT	NT	NT	ND	C[C@@H]1CCC[C@H](NC(=O)CN2CCN(CCC3=CCCCC3)CC2)C1	4.57874	1.70493
292	ZINC000417806012	ZINC000417806012	-47.5046	1641789	0.285714	0.961679	NT	NT	NT	ND	CC(C)(C(=O)N[C@@H]1CCCc2cc(N)ccc21)[C@H](N)c1ccccc1	3.68467	2.68209
293	ZINC000416493836	Z2358916962	-47.5048	1641780	0.309859	0.722672	NT	NT	NT	ND	Cc1cc([N+](=O)[O-])cc(C)c1S(=O)(=O)NC[C@H]1CCN(C)C1	1.60249	0.673745
294	ZINC000370933962	Z1500052245	-47.5045	1641610	0.277108	0.989457	NT	NT	NT	ND	CN1CCC(C(=O)N2CCC[C@@H](c3nc4ccc(F)cc4o3)C2)CC1	3.44634	2.15187
295	ZINC000370893072	Z1185966042	-47.5048	1641608	0.342857	0.820738	NT	NT	NT	ND	O=C1CCCCN1[C@@H]1CCCN(Cc2cc(-c3ccccc3)no2)C1	5.27461	2.59406
296	ZINC000367601434	Z2070861096	-47.5047	1641578	0.272727	0.907782	NT	NT	NT	ND	Cc1ccccc1Cc1nnc(CN2C[C@@H](N3CCCC3)C[C@H]2C)o1	1.99979	0.777753
297	ZINC000362611503	Z1302947967	-47.5045	1641523	0.305556	0.278453	NT	NT	NT	ND	CCO[C@@H](CC(=O)N1CCCN(C2CCCC2)CC1)C1=CCCC1	4.84399	1.57893
298	ZINC000285662957	Z2070980036	-47.5044	1640983	0.290909	0.174539	NT	NT	NT	ND	COc1ccc(-c2ccccc2)cc1CNCCC1(O)CCOCC1	3.84995	1.79332
299	ZINC000272631760	Z1630257371	-47.504	1640875	0.243243	0.911914	NT	NT	NT	ND	CN1CCC(C)(CNC(=O)Nc2ccc(Br)nc2)CC1	2.15987	0.916291
300	ZINC000272592294	Z2931805209	-47.5047	1640872	0.269841	0.791467	NT	NT	NT	ND	Cc1c(Br)cccc1C(=O)N1CC[C@@H]2CCN(C)C[C@H]21	4.00647	2.13649
301	ZINC000265281429	Z1215601135	-47.504	1640797	0.33871	0.97533	NT	NT	NT	ND	Cc1cccnc1[C@H](NC(=O)N1CCN(C2CCC2)CC1)C(C)C	6.11056	2.10993
302	ZINC000237909071	Z4079013418	-47.5044	1640685	0.333333	0.889856	NT	NT	NT	ND	N[C@@H](CC(=O)Nc1cccc(C(=O)N2CCCC2)c1)c1ccccc1	5.71771	1.84941
303	ZINC000194878845	Z1944110869	-47.5042	1640634	0.35	1.09113	NT	NT	NT	ND	CC(C)(C)N1CCC(NC(=O)c2ncccc2Br)CC1	2.3782	1.78426
304	ZINC000159130997	Z1414567598	-47.5046	1640353	0.295082	1.07851	NT	NT	NT	ND	CC(C)[C@H](C(=O)NC[C@H](C[C@@H](C)O)c1ccccc1)N1CCCCC1	7.55936	1.84982
305	ZINC000153451054	Z1400756133	-47.5047	1640315	0.289474	0.171615	NT	NT	NT	ND	Cc1cc(C(C)(C)C)ccc1OC[C@@H](O)CN1CC[C@]2(CCOC2)C1	5.58421	2.0925
306	ZINC001403624658	Z4670319505	-47.5048	1646408	0.295082	0.652641	NT	NT	NT	ND	COc1ccc(C(=O)N(C)C[C@H](C)NCC2CCC(C)(C)CC2)nn1	7.07811	1.89365
307	ZINC001399642198	Z4670319495	-47.5041	1646401	0.216216	0.212482	NT	NT	NT	ND	C[C@@H]1CCC[C@H](CCN(C)CCNC(=O)c2c3c(nn2C)CCC3)C1	4.20746	2.52871
308	ZINC001391502525	Z4670289721	-47.5044	1646389	0.323529	0.436076	NT	NT	NT	ND	O=C(NCC1CN(CCC2CCCC2)C1)C1(c2cccnc2)CC1	4.75703	1.74848
309	ZINC001381212829	Z4670289720	-47.5044	1646382	0.227273	0.711072	NT	NT	NT	ND	Cc1c(C(=O)NCC[C@H](C)NCc2nccc(C)n2)ccn1C(C)C	4.20808	1.51458
310	ZINC000130668661	Z1564946356	-47.5045	1640271	0.34	0.686259	NT	NT	NT	ND	CN1CCN(c2ncc(CN3CCN(CC4CC4)CC3)cn2)CC1	4.83218	2.31836
311	ZINC001196417557	Z4670289719	-47.5046	1645787	0.30137	0.718618	NT	NT	NT	ND	CCc1ccc(F)cc1C(=O)N1CCCN(CCOC(C)C)CC1	6.67366	2.12687
312	ZINC001099969021	Z4670319526	-47.5049	1645370	0.3	0.284864	NT	NT	NT	ND	O=C(N[C@@H]1CCN(CCC2CCCC2)C[C@@H]1O)C1(C(F)F)CCC1	4.78031	1.88776
313	ZINC001077034834	Z4670319519	-47.504	1645249	0.28125	0.165325	NT	NT	NT	ND	Cc1c(F)cccc1C(=O)N[C@@H]1CN(CCC2CCCCC2)C[C@H]1O	2.05198	0.623285
314	ZINC001061620290	Z4670319443	-47.5048	1645213	0.246914	0.912775	NT	NT	NT	ND	CN1CCC(C(=O)NC[C@@H]2CCN(c3ncc(Cl)cn3)C2)CC1	2.8657	1.0776
315	ZINC001061317651	Z4670289717	-47.5048	1645212	0.25974	0.625604	NT	NT	NT	ND	CN1CCC[C@@H]1C(=O)NC[C@H]1CCCN1c1ncnc2scnc21	6.19236	2.35307
316	ZINC001040612984	Z4670289716	-47.5047	1645141	0.305556	0.999532	NT	NT	NT	ND	COc1ccnc(CN2CCC3(CCN(C(=O)C(C)C)C3)CC2)c1	2.61875	1.23596
317	ZINC001033739722	Z4422878790	-47.5048	1645092	0.291667	0.246064	NT	NT	NT	ND	CCN(C(=O)c1cnccn1)[C@@H]1CCN(CC2CCCCCC2)C1	5.43326	1.80155
318	ZINC001032169623	Z4670289715	-47.5044	1645059	0.283582	0.928237	NT	NT	NT	ND	Cc1ccnc2nc(C(=O)NCC3CN(CCCC4CCC4)C3)nn21	6.61341	2.97482
319	ZINC001018723708	Z4670289714	-47.5042	1644923	0.298701	1.0135	NT	NT	NT	ND	Cc1cc(C(=O)N2CC[C@H](NCc3cccc(Cl)c3F)C2)ncn1	3.30068	1.79809
320	ZINC001004070100	Z4670319509	-47.5049	1644876	0.309859	0.855376	NT	NT	NT	ND	CC[C@@H](C(N)=O)N1CCC(NC(=O)[C@H]2Cc3ccc(Cl)cc32)CC1	3.44213	1.88125
321	ZINC000971070823	Z4670319896	-45.0046	4281957	0.283582	0.908907	NT	NT	NT	ND	Cc1cc(C(=O)N2CC[C@H](N(C)Cc3ccc(C)c(C)c3)C2)on1	3.33382	2.6447
322	ZINC000929842198	Z2947439720	-45.0039	4281540	0.225352	1.03913	NT	NT	NT	ND	O=C1CCCCN1C1CCN(C[C@H](O)C[C@]2(O)CCOC2)CC1	7.32998	2.5943
323	ZINC000897504395	Z2977471156	-45.0043	4281106	0.28	0.908759	NT	NT	NT	ND	C[C@@H]1CCCN1CCNC(=O)N1CCC[C@@H]1[C@@H]1CCCC[C@@]1(C)O	3.30811	2.13667
324	ZINC000880249690	Z2842451641	-45.0043	4280844	0.345455	1.13402	NT	NT	NT	ND	NC(=O)C1(N2CCCCC2)CCN(CC(=O)NCC2CCC2)CC1	5.8224	1.97283
325	ZINC000774469834	Z2028809437	-45.0044	4279905	0.313725	0.832522	NT	NT	NT	ND	O=C(NC1CCCCC1)C(=O)NC1CCN(C[C@H]2CCCO2)CC1	5.63876	1.90171
326	ZINC000679555790	Z1629918162	-45.004	4279567	0.279412	1.03062	NT	NT	NT	ND	COCCOCc1cccc(NC(=O)NCC2(C)CCN(C)CC2)c1	2.26594	0.92283
327	ZINC000673584800	Z2145850283	-45.0047	4279488	0.339623	1.10098	NT	NT	NT	ND	O=C(NCCCC1CC1)C(=O)NC1CCN([C@H]2CCC[C@@H]2O)CC1	2.90084	2.29719
328	ZINC000667676804	Z2356289856	-45.0037	4279359	0.228571	0.944242	NT	NT	NT	ND	O=C(Nc1cnn(CC2CC2)c1)C(=O)N1CCC[C@H]([C@@H]2CCNC2)C1	5.20098	2.31792
329	ZINC000655168559	Z2500262355	-45.0047	4278968	0.318841	0.975845	NT	NT	NT	ND	O=C(Nc1ccc2ncnn2c1)[C@]1(O)CCN(Cc2ccccc2)C1	4.48603	1.97428
330	ZINC000623468108	Z2697650278	-45.0045	4278334	0.274194	0.8489	NT	NT	NT	ND	C[C@@H]1CCCC[C@H]1OCCNC(=O)NC[C@H]1CCCCN(C)C1	3.59827	1.21301
331	ZINC000603324806	Z1191804904	-45.0045	4278096	0.253521	0.655126	NT	NT	NT	ND	CCc1c(C(=O)N[C@@H](C)C2CCN(C)CC2)cnn1-c1ccccc1	6.81387	2.6443
332	ZINC000588863575	Z2143998367	-45.0042	4277895	0.297297	1.3379	NT	NT	NT	ND	O=C(Cn1cc([N+](=O)[O-])ccc1=O)N1CC[C@H](N2CC[C@@H](O)C2)C1	3.63392	2.31411
333	ZINC000495656270	Z2015801612	-45.0044	4276787	0.305556	0.450742	NT	NT	NT	ND	CCCCNC(=O)[C@H](C)N1CC[C@](C)(CNC(=O)OC(C)(C)C)C1	4.45925	1.98378
334	ZINC000453336584	Z2286516142	-45.0041	4276316	0.275362	1.00189	NT	NT	NT	ND	C[C@@H](CC(N)=O)NC[C@H](CO)Cc1cc(Br)ccc1F	7.37186	1.51528
335	ZINC000415549177	Z2355792372	-45.0037	4275670	0.242424	0.738417	NT	NT	NT	ND	O=C(NC[C@H]1CCCN1)Nc1cc(F)cc(F)c1Br	1.43344	0.887452
336	ZINC000358071102	Z2128309149	-45.005	4275056	0.28169	1.12573	NT	NT	NT	ND	CCc1ccnc(CNC(=O)C(=O)N[C@@H]2C[C@H](C)N(C3CC3)C2)c1	5.74875	2.17767
337	ZINC000358051108	Z1687252313	-45.0048	4275054	0.297619	1.02294	NT	NT	NT	ND	CN1CC[C@](O)(CNC(=O)c2cc3cc([N+](=O)[O-])ccc3s2)C1	1.63796	1.50316
338	ZINC000345970626	Z2156547523	-45.005	4274806	0.285714	0.716599	NT	NT	NT	ND	CC[C@H](NC(=O)C(=O)N(CC)CCCN1CCCC1)[C@@H]1CCCO1	6.33349	1.90167
339	ZINC000340106708	Z3007447312	-45.0039	4274656	0.322034	0.499766	NT	NT	NT	ND	Cc1ccncc1N1CCN(C[C@H](O)CN2C[C@@H](C)O[C@H](C)C2)CC1	4.44249	1.4706
340	ZINC000339640280	Z2029898084	-45.0044	4274642	0.32	1.0579	NT	NT	NT	ND	C[C@H]1CN(CCN(C)C(=O)C(=O)NC2CCN(C)CC2)C[C@H](C)O1	5.81361	2.13722
341	ZINC000334024070	Z2330904130	-45.0037	4274521	0.287879	1.10695	NT	NT	NT	ND	C[C@H](C(=O)NCC1CCCCC1)N1CCC[C@H](N2CCCC2=O)CC1	4.60079	1.50292
342	ZINC000298791523	Z649291414	-45.0047	4274320	0.314286	0.890292	NT	NT	NT	ND	O=C(CN1CCC(c2nc3cc(Cl)ccc3o2)CC1)N1CCC1	3.49191	1.81904
343	ZINC000188412270	Z2435429359	-45.0041	4273358	0.283333	1.06472	NT	NT	NT	ND	O=C(NCCc1ccc(F)c(Br)c1)[C@H]1C[C@H](F)CN1	3.1097	2.12882
344	ZINC001437918206	Z4670320167	-45.0043	4286062	0.2625	1.02571	NT	NT	NT	ND	Cc1cnc(CN2CC[C@@H](CCNC(=O)c3cncs3)C2)s1	2.19408	1.51529
345	ZINC001419404744	Z4670289759	-45.0048	4286029	0.337838	0.195652	NT	NT	NT	ND	Cc1cc(C)nc(C(=O)NCCC2CCN(CCOC(C)C)CC2)c1	3.81862	1.54508
346	ZINC001377717241	Z4670320150	-45.0044	4285904	0.27027	1.01462	NT	NT	NT	ND	CCC1(C(=O)NCC[C@@H]2CCN(Cc3nccn3C)C2)CCCC1	3.224	0.903381
347	ZINC000136880129	Z2434891003	-45.0049	4272868	0.253521	0.538674	NT	NT	NT	ND	O=C(NCc1ccc(F)cc1C(F)(F)F)[C@@H]1CC12CCNCC2	3.01506	1.43835
348	ZINC001149399826	Z4670320141	-45.0039	4284075	0.270588	0.964238	NT	NT	NT	ND	CN1CCC[C@@H]1C(=O)NC[C@H]1CN(CCCC(C)(C)C)CCCO1	4.58484	2.35315
349	ZINC001048683995	Z4670289756	-45.0038	4283155	0.277778	0.616509	NT	NT	NT	ND	Cc1ccc(CN2C[C@@H]3CN(C(=O)c4cccn4C)C[C@@H]3C2)cc1C	3.69496	2.64471
350	ZINC001019309159	Z4670320189	-45.0047	4282459	0.295775	0.996227	NT	NT	NT	ND	O=C([C@H]1Cc2ccccc21)N1CC[C@H](NCc2ccncc2Cl)C1	2.08864	1.14669
351	ZINC001002178741	Z4670289763	-45.0038	4282269	0.35	1.08968	NT	NT	NT	ND	Cc1cccc(F)c1C(=O)NCC1CCN(CCn2cncn2)CC1	6.7017	2.08318
352	ZINC000973375109	Z4670321253	-42.5041	9184026	0.313433	1.10868	NT	NT	NT	ND	C[C@@H]1CCN(CC(=O)N[C@H]2C[C@H](NC(=O)c3cnnc(O)c3)C2)C1	4.12537	2.21175
353	ZINC000950078544	Z4670321496	-42.5049	9183476	0.230769	1.08009	NT	NT	NT	ND	Cc1cc(C)nc(C(=O)N2CC[C@H]2CNC(=O)[C@@H]2CCN(C)C2)c1	4.07748	1.50348
354	ZINC000903470913	Z2899013918	-42.5044	9182545	0.30303	0.922217	NT	NT	NT	ND	O=C(CN[C@H]1CCNC12CCC2)NCCN1CCc2ccccc21	5.7459	1.88105
355	ZINC000847525041	Z2497215184	-42.5041	9181198	0.265823	0.593129	NT	NT	NT	ND	CN1CC[C@]2(CCN(C(=O)C(=O)Nc3cccc4nonc43)C2)C1	4.8518	2.13696
356	ZINC000805503179	Z2100673253	-42.504	9180643	0.225352	1.0515	NT	NT	NT	ND	CN1CCN(CCNC(=O)C(=O)NC[C@H]2CCC=CO2)CC1(C)C	3.17763	1.43185
357	ZINC000804054066	Z2084065212	-42.5048	9180634	0.268657	0.900243	NT	NT	NT	ND	O=C(NC[C@@H]1CN2CCC[C@@H]2CO1)C(=O)N[C@@H]1CC[C@H]2CCC[C@@H]2C1	1.85722	1.42414
358	ZINC000738383044	Z4510491787	-42.5049	9180101	0.253521	1.17578	NT	NT	NT	ND	O[C@@H](CN1CCN(c2ccc(-c3nn[nH]n3)cc2F)CC1)C1CC1	4.9856	2.32245
359	ZINC000595353335	Z2599443822	-42.5039	9177460	0.319444	0.977326	NT	NT	NT	ND	CCCN1CC[C@H](NS(=O)(=O)c2ccc(C(=O)OC)cc2F)C1	3.66875	1.34294
360	ZINC000576277949	Z2439481656	-42.5047	9177091	0.262295	0.671766	NT	NT	NT	ND	C[C@H](NC1CC1)C(=O)NCc1ccc(C(=O)N=c2cc[nH]cc2)cc1	6.97129	2.14022
361	ZINC000556797005	Z2317426730	-42.5048	9176687	0.310345	0.79898	NT	NT	NT	ND	CN1CCN(C(=O)C(=O)N2CCCN(C3CCCC3)CC2)CC1=O	4.16438	2.13654
362	ZINC000555574173	Z2027955462	-42.5043	9176659	0.333333	1.06603	NT	NT	NT	ND	CN1CCN(CCCCNC(=O)C(=O)N2CCSCC2)CC1	4.93598	1.83936
363	ZINC000438095302	Z1783454190	-42.5047	9174651	0.274194	0.381017	NT	NT	NT	ND	C[C@@H]1CCC[C@@H](NC(=O)CN2CCN(CC[C@@H]3CCOC3)CC2)C1	5.90012	1.69061
364	ZINC000418924570	Z2365003665	-42.5049	9174087	0.24359	0.649432	NT	NT	NT	ND	Cc1cccc(C)c1OC[C@H](C)NC(=O)C(=O)NC[C@@H]1CCCNC1	2.77624	1.52147
365	ZINC000377772869	Z1249310378	-42.5042	9173616	0.305556	1.00101	NT	NT	NT	ND	CS[C@H](CO)[C@@H](C)NC(=O)N[C@@H]1CCN(C2CCN(C)CC2)C1	3.61973	1.50342
366	ZINC000363920872	Z1414243280	-42.5044	9173179	0.279412	0.889497	NT	NT	NT	ND	CC(C)N1CCN([C@H]2CCN(C(=O)CC3(O)CCCCC3)C2)CC1	5.26266	2.13802
367	ZINC000283462313	Z2027890301	-42.5046	9171287	0.347826	0.984793	NT	NT	NT	ND	Cc1noc(C)c1CNC(=O)C(=O)N1CCN(C2CCCC2)CC1	6.30828	2.87588
368	ZINC000276781830	Z1799344772	-42.5049	9171131	0.256757	0.975911	NT	NT	NT	ND	CC[C@@]1(C)Oc2ccc(NC(=O)C(=O)NC[C@@H]3CCN(C)C3)cc2O1	4.23981	1.77269
369	ZINC000270395954	Z1526216282	-42.5047	9170979	0.256757	1.20679	NT	NT	NT	ND	COCC1(O)CCN(C[C@@H](O)Cn2cnc3cc(C)c(C)cc32)CC1	3.43582	1.47095
370	ZINC000182663590	Z1659072002	-42.5039	9170002	0.246575	0.979539	NT	NT	NT	ND	C[C@H](CCNC(=O)N1CCO[C@H]([C@@H]2CCCO2)C1)N1CCCCC1	6.42556	2.13657
371	ZINC000178638284	Z1440003064	-42.505	9169879	0.253731	1.11072	NT	NT	NT	ND	O=C1Nc2ccccc2C12CCC(NCC1(O)CCOCC1)CC2	1.52442	1.16257
372	ZINC000152090354	Z1403332363	-42.5043	9169412	0.293103	0.447368	NT	NT	NT	ND	COC(=O)[C@@H](C)CS(=O)(=O)N[C@@H]1CCN(CC2CCCC2)C1	5.06269	1.51504
373	ZINC001072835483	Z4670321552	-42.5045	9186763	0.204545	0.817767	NT	NT	NT	ND	CNC(=O)[C@@H](C)N1CCC2(CN(C(=O)c3c[nH]c4nccc-4c3)C2)C1	4.13083	2.12118
374	ZINC001055479120	Z4670321532	-42.5049	9186689	0.31746	0.985239	NT	NT	NT	ND	CC(=O)NCCN1CCC(NC(=O)c2c(C)[nH]nc2Cl)CC1	5.59247	2.73885
375	ZINC001041605786	Z4670321432	-42.5042	9186302	0.240506	1.09739	NT	NT	NT	ND	O=C([C@@H]1CCCN(CC(F)F)C1)N1CC[C@]2(CCN(CCO)C2)C1	4.9859	2.13628
376	ZINC001021041334	Z4670321424	-42.5048	9185186	0.298507	0.862319	NT	NT	NT	ND	Cc1ccccc1CN[C@H]1C[C@H](NC(=O)c2cn(C)c(=O)nc2O)C1	4.54615	2.40873
377	ZINC001006004942	Z4670289793	-42.5042	9184781	0.209302	1.25628	NT	NT	NT	ND	C[C@@H](NC(=O)c1cnnn1C)C1CN(C(=O)C23CCCN2CCC3)C1	2.09745	1.51472
378	ZINC001003018745	Z4670289792	-42.5041	9184684	0.246753	0.856683	NT	NT	NT	ND	CCc1nnsc1C(=O)NCC1CN(C(=O)[C@H]2CCCN2C)C1	5.9641	1.77668
379	ZINC001000730978	Z4670321513	-42.5043	9184598	0.315789	0.813473	NT	NT	NT	ND	O=C(NCC1CN(C(=O)[C@H]2CC[C@H]3CCCCN32)C1)c1cnccn1	2.69466	1.51495
380	ZINC000995014137	Z4670289824	-40.0041	16745329	0.282051	1.22931	NT	NT	NT	ND	Cc1c(C(=O)NC2CN(C(=O)c3cnns3)C2)ccc2cncn21	5.80968	2.73885
381	ZINC000991393621	Z4670289823	-40.0048	16745251	0.267606	1.16099	NT	NT	NT	ND	CCc1noc(C)c1C(=O)NC1CN(C(=O)[C@H]2CCCCN2C)C1	7.87918	2.39757
382	ZINC000955102158	Z4670321756	-40.0037	16743774	0.25	1.11291	NT	NT	NT	ND	CN(C(=O)c1cccnn1)C1CN(C(=O)[C@H]2CCC[C@H]3CCCN32)C1	5.17387	2.11986
383	ZINC000937267298	Z4670321700	-40.0048	16743375	0.236111	1.11071	NT	NT	NT	ND	C[C@H]1CCCN1CC(=O)N(C)[C@H]1CCN(C(=O)CC(C)(C)O)C1	4.80429	2.13732
384	ZINC000813849560	Z2202566421	-40.0046	16739916	0.283333	1.08435	NT	NT	NT	ND	C[C@H](NC(=O)c1ccc2[nH]c(=O)c(=O)[nH]c2c1)[C@H](O)c1ccccc1	2.68767	1.8703
385	ZINC000679371269	Z3080218908	-40.0039	16738743	0.216867	1.14355	NT	NT	NT	ND	CN1CC[C@H]2CCN(C(=O)C(=O)Nc3cnc4c(c3)COCC4)[C@@H]2C1	3.38412	1.83787
386	ZINC000671981913	Z2084190151	-40.0048	16738552	0.28	1.05718	NT	NT	NT	ND	C[C@@H](NC(=O)C(=O)NCCCN1CCC[C@H](C(N)=O)C1)C1CCC1	5.74738	1.68739
387	ZINC000627254962	Z2712887551	-40.0046	16736329	0.283333	1.13467	NT	NT	NT	ND	O=C([C@@H]1CCCN1c1ncccn1)N1CC[C@@H](N2CC[C@H](O)C2)C1	2.81188	1.15801
388	ZINC000045463977	Z495734882	-40.0039	16722778	0.322034	1.06995	NT	NT	NT	ND	CC(C)CN1CCC(NC(=O)NNC(=O)C(=O)NC2CC2)CC1	4.26366	1.83942
389	ZINC000419873354	Z2367259197	-40.0046	16730953	0.273973	0.957421	NT	NT	NT	ND	CC[C@H]1CN(C(=O)C(=O)NCCCN2CCNCC2)CCS1	3.54423	1.3212
390	ZINC000358062278	Z1687262970	-40.0047	16729240	0.275862	1.01732	NT	NT	NT	ND	CN1CC[C@](O)(CNC(=O)c2ccc([N+](=O)[O-])c3cccnc23)C1	3.28862	1.50332
391	ZINC000297448741	Z2315500637	-40.0037	16727579	0.264706	1.04832	NT	NT	NT	ND	CN(CCCN(C)C(=O)C(=O)N(CCO)C1CC1)Cc1ccco1	6.97265	1.32171
392	ZINC000287105318	Z2101754018	-40.0044	16727190	0.231884	1.17298	NT	NT	NT	ND	Cc1c(CNC(=O)C(=O)N2CC[C@@H](C3CCN(C)CC3)C2)cnn1C	6.20103	2.8511
393	ZINC000279187431	Z1907290928	-40.0046	16726935	0.225	1.04948	NT	NT	NT	ND	COCCOc1ccc(NC(=O)C(=O)N2C[C@H]3CN(C)C[C@H]3C2)cn1	7.84645	2.32748
394	ZINC000158577469	Z1428495312	-40.0048	16724695	0.219178	1.1113	NT	NT	NT	ND	C[C@H]1C[C@@H](NC(=O)C(=O)Nc2cnn(CC(F)F)c2)CN1C1CC1	4.3423	2.17687
395	ZINC001365986475	Z4670289834	-40.0047	16755723	0.333333	1.08859	NT	NT	NT	ND	COC[C@@H](O)CN1CC[C@H](NC(=O)c2c(C)c(C)nn(C)c2=O)C1	3.48586	2.40877
396	ZINC000133744458	Z2437898285	-40.0039	16724378	0.25974	0.657005	NT	NT	NT	ND	CN(C(=O)C[C@@H]1CSCCN1)[C@@H]1CCCN(c2cccnn2)C1	3.40394	1.30234
397	ZINC001073859800	Z4670321669	-40.0044	16749059	0.325843	1.10414	NT	NT	NT	ND	CCc1cc(C(=O)NC[C@H]2CN(CCn3cncn3)CCCO2)no1	6.39914	2.08307
398	ZINC001055138151	Z4670289847	-40.0046	16748861	0.215385	1.02764	NT	NT	NT	ND	Cc1cnc(C(=O)N2C[C@H]3CN(C(=O)CN(C)C(C)C)C[C@H]3C2)cn1	5.79613	1.97618
399	ZINC001054647418	Z4670321663	-40.004	16748846	0.305882	1.04386	NT	NT	NT	ND	COCCn1cc(C(=O)N2C[C@@H](C)[C@@H](NCc3ccccn3)C2)nn1	6.56728	2.1363
400	ZINC001039123057	Z4670321643	-40.0041	16748099	0.232877	1.14563	NT	NT	NT	ND	C[C@@H](O)CN1CC[C@H](C2CCN(C(=O)CN3CCOCC3)CC2)C1	6.81734	2.12496
401	ZINC001028614115	Z4670321630	-40.0046	16747245	0.236111	1.15311	NT	NT	NT	ND	Cc1nc(O)[nH]c1C(=O)NC[C@H]1CCN([C@H](C)C(=O)NC2CC2)C1	1.85243	0.63933
402	ZINC001028403773	Z4670321624	-40.0036	16747183	0.276316	1.09023	NT	NT	NT	ND	Cc1cc(C(=O)NC[C@@H]2CCN(CC(=O)Nc3cnccn3)C2)on1	3.78121	1.78707
403	ZINC001018665695	Z4670321781	-40.0039	16746246	0.243243	1.20033	NT	NT	NT	ND	Cn1ccc(N2CC[C@@H](N[C@H]3CCN(C(=O)CC4CCC4)C3)C2=O)n1	7.59906	2.13676
404	ZINC001002391793	Z4670321604	-40.0041	16745751	0.287879	0.901484	NT	NT	NT	ND	CCN1CC[C@@H](N2CCC(NC(=O)c3cncnc3C)CC2)C1=O	2.72609	1.77852
405	ZINC001001445660	Z4670321773	-40.0047	16745711	0.238095	0.920558	NT	NT	NT	ND	O=C(NCC1CCN([C@H]2CCNC2=O)CC1)c1ccn(C(F)F)n1	6.53508	2.33889
406	ZINC000997292482	Z4670323012	-37.5042	27058057	0.347222	0.878548	NT	NT	NT	ND	Cc1n[nH]cc1C(=O)NC1CN(C(=O)[C@H]2C[C@@H]3CCCCN3C2)C1	1.04235	0.493635
407	ZINC000982403760	Z4670289880	-37.5039	27057145	0.264368	1.04177	NT	NT	NT	ND	CC(C)=CC(=O)N1CC[C@@H](CNC(=O)c2ccn(CCN(C)C)n2)C1	4.1318	1.38722
408	ZINC000936344871	Z4670323383	-37.5044	27055230	0.263889	0.82716	NT	NT	NT	ND	C[C@H]1CCCN1CC(=O)N(C)[C@H]1CCN(C(=O)C2CCOCC2)C1	3.59057	1.17655
409	ZINC000891830660	Z2968125940	-37.5042	27053322	0.283784	1.16423	NT	NT	NT	ND	CO[C@@H]1CN(C(=O)NCc2ccnc(N3CCN(C)CC3)c2)CCO1	4.91272	2.13688
410	ZINC000863492725	Z2722031649	-37.5044	27052173	0.25	1.7869	NT	NT	NT	ND	CCC1(N2CCOCC2)CCN(C(=O)C2=NN(C)C(=O)CC2)CC1	4.17549	2.40865
411	ZINC000806327364	Z2107898889	-37.5047	27050726	0.298246	1.05851	NT	NT	NT	ND	CC[C@@H](CN1CCCC1)NC(=O)C(=O)NC1COC(C)(C)OC1	4.17521	1.5034
412	ZINC000518759550	Z221129296	-37.5035	27042471	0.307692	1.14584	NT	NT	NT	ND	Cc1ccnc2nc(C(=O)N3CCN(CCN4CCCC4)CC3)nn21	6.33417	2.39025
413	ZINC000444807044	Z1771761660	-37.5046	27040276	0.19697	1.20198	NT	NT	NT	ND	CCO[C@@H]1C[C@](CO)(NC[C@H](O)COC2CCOCC2)C1(C)C	6.69677	1.68832
414	ZINC000438905691	Z1486352592	-37.504	27040072	0.25	1.05376	NT	NT	NT	ND	Cc1c(C(=O)NCC2CCCC2)cnc2c1c(=O)n(C)c(=O)n2C	3.83395	1.88883
415	ZINC000419445843	Z2366046350	-37.505	27039056	0.30303	0.825426	NT	NT	NT	ND	CN(Cc1ccccc1)C(=O)CNC(=O)C(=O)N[C@H]1CCCNC1	1.09563	0.575319
416	ZINC000378210510	Z2437464324	-37.5039	27037950	0.327586	0.95296	NT	NT	NT	ND	NC(=O)c1ccccc1N1CC[C@H](NC(=O)CC2CCNCC2)C1	5.00697	1.88289
417	ZINC000366544782	Z2208128794	-37.5037	27037378	0.224138	1.10504	NT	NT	NT	ND	CN1CC[C@]2(CCN(C(=O)CN3C(=O)NC4(CCCC4)C3=O)C2)C1	0.722017	0.514645
418	ZINC000349353698	Z1869123365	-37.5048	27036436	0.333333	1.4242	NT	NT	NT	ND	C[C@@H]1CCN2C(=O)N(CCCN3CCC[C@@H](C(N)=O)C3)C(=O)[C@H]2C1	2.37593	1.82582
419	ZINC000343016571	Z2049584546	-37.5037	27036040	0.333333	1.17791	NT	NT	NT	ND	COCCN1CCC(NC(=O)C(=O)N[C@H]2CCOC(C)(C)C2)CC1	2.37663	1.17644
420	ZINC000286782676	Z2439248019	-37.5037	27034389	0.222222	1.3239	NT	NT	NT	ND	CCc1nn(C)c(Cl)c1C(=O)N1CC[C@@H](N2CCNCC2)C1	3.9376	2.73885
421	ZINC001416718427	Z4670323372	-37.5039	27072472	0.25974	0.804885	NT	NT	NT	ND	CCN1CCCC[C@H]1C(=O)NC[C@@H](O)CNC(=O)c1cnccn1	2.80893	1.51499
422	ZINC001369886058	Z4670289876	-37.5035	27071520	0.293103	1.11305	NT	NT	NT	ND	O=C(CCn1cccn1)NCCN1CCN(CCn2cccn2)CC1	6.96836	2.11282
423	ZINC001088099598	Z4670323323	-37.5044	27063740	0.235294	1.3236	NT	NT	NT	ND	Cc1ccoc1CC(=O)N1C[C@H]2CCN(CC(=O)N(C)C)C[C@H]2C1	4.81644	1.65052
424	ZINC001074556982	Z4670323452	-37.5038	27062813	0.219178	0.895867	NT	NT	NT	ND	O=C(C[C@H]1C=CCC1)NCC1(O)CCN(C(=O)c2cncnc2)CC1	7.00811	2.13713
425	ZINC001073886256	Z4670323443	-37.504	27062797	0.295455	1.12716	NT	NT	NT	ND	CN1CC[C@@H](C(=O)NC[C@H]2CN(Cc3csnn3)CCCO2)C1	4.00135	1.40471
426	ZINC001052175095	Z4670323317	-37.5049	27062336	0.297297	1.03756	NT	NT	NT	ND	CCN1CC[C@H](N2CCC[C@@H](NC(=O)c3ccc(O)nn3)CC2)C1=O	3.98309	2.40865
427	ZINC001051553588	Z4670323310	-37.5037	27062271	0.261364	1.04836	NT	NT	NT	ND	Cc1ncc(CNC[C@@H]2CN(C(=O)c3cn(C)cn3)CCO2)cn1	3.64662	2.1371
428	ZINC001042098162	Z4670289865	-37.5036	27061610	0.253521	1.01637	NT	NT	NT	ND	CN1CCC[C@H]1C(=O)NCC1(O)CN(C(=O)CCc2ncccn2)C1	5.95154	1.59103
429	ZINC001023604137	Z4670323256	-37.5039	27059743	0.241379	0.892713	NT	NT	NT	ND	C[C@@H](C(N)=O)N1CCC[C@H](CNC(=O)c2nn(C)c3c2CCCC3)C1	5.27789	1.88029
430	ZINC001021109191	Z4670289863	-37.5047	27059409	0.278481	1.05904	NT	NT	NT	ND	Cn1cc(CN[C@H]2C[C@H](NC(=O)c3cccc(C(N)=O)n3)C2)cn1	1.6302	0.661928
431	ZINC001019525589	Z4670323028	-37.5044	27059164	0.275862	0.849973	NT	NT	NT	ND	Cc1ccc(C(=O)NC[C@H]2CN(C(=O)[C@@H]3CCN(C)C3)CCCO2)o1	5.1966	2.12637
432	ZINC000956566890	Z4670325167	-32.5045	58783667	0.289855	1.12528	NT	NT	NT	ND	CCC(=O)N1CCN([C@H]2CCN(C(=O)c3c[nH]c(=O)cn3)C2)CC1	6.28084	2.73858
433	ZINC000861751799	Z2713237703	-32.5045	58777328	0.231707	1.06265	NT	NT	NT	ND	Cc1cc(N(C)C)ccc1CNC(=O)C(=O)NC[C@@H]1COCCN1	3.84528	1.83929
434	ZINC000531495018	Z1386110604	-32.5047	58758088	0.276923	0.993106	NT	NT	NT	ND	CC(=O)N1CCN(C(=O)C(=O)Nc2cnn(-c3ccccn3)c2)CC1	7.12474	2.12774
435	ZINC000422349618	Z2375737391	-32.5047	58750144	0.266667	1.29081	NT	NT	NT	ND	COC(=O)[C@@]1(C)CCCN(C(=O)C(=O)N[C@@H](C)Cc2ccncc2)C1	7.25807	2.12561
436	ZINC000420063417	Z2367984694	-32.5045	58749856	0.288136	0.940795	NT	NT	NT	ND	NC[C@@H](NC(=O)C(=O)NCCN1CCSCC1)C1CCCC1	5.85775	1.84994
437	ZINC000361132106	Z2143313061	-32.5041	58746476	0.206522	0.763822	NT	NT	NT	ND	Cc1nc2n(n1)CCN(C(=O)C(=O)N[C@@H]1CCO[C@@H](CC(C)C)C1)C2	4.46862	1.95262
438	ZINC001328800283	Z2104441192	-32.5041	58806168	0.290909	0.863929	NT	NT	NT	ND	C[C@@H](CNC(=O)C(=O)NCc1nnn(C)n1)N(C)Cc1ccccc1	2.90126	1.16263
439	ZINC001323717111	Z2083094175	-32.5041	58805943	0.260274	0.950324	NT	NT	NT	ND	COC(=O)N1CCC[C@H](NC(=O)C(=O)N2CC[C@@](O)(C3CC3)C2)C1	4.47586	1.91614
440	ZINC001261177261	Z2098910446	-32.5049	58804020	0.242424	0.708803	NT	NT	NT	ND	CCNS(=O)(=O)CCNC(=O)C(=O)N[C@@H](C)C1=CCN(C)CC1	4.82797	1.6705
441	ZINC001202928172	Z4670325486	-32.5049	58801143	0.19697	1.17228	NT	NT	NT	ND	CN(C)S(=O)(=O)N(C)CC(=O)N[C@@H]1C[C@H](NCCO)C12CCC2	4.24047	1.35393
442	ZINC001199969207	Z4670325476	-32.5037	58800914	0.26506	1.24381	NT	NT	NT	ND	Cc1cc(C(=O)N2CCCO[C@@H](CNCC(=O)NC3CC3)C2)n(C)n1	6.85145	2.64476
443	ZINC001115282185	Z4670289926	-32.5036	58795907	0.239437	1.0942	NT	NT	NT	ND	CN(C)S(=O)(=O)CCC(=O)N[C@@H]1[C@H]2CN(Cc3ccon3)C[C@H]21	4.59322	1.62416
444	ZINC001105862991	Z4670325448	-32.5041	58795331	0.208333	0.760557	NT	NT	NT	ND	Cc1cc(C)nc(NC[C@@H](O)CNC(=O)[C@@H]2CCc3c[nH]nc3C2)n1	3.31969	1.50293
445	ZINC001071984909	Z4670323682	-32.504	58792710	0.263889	0.898551	NT	NT	NT	ND	C[C@@H]1CN(C(=O)Cc2cncnc2)C[C@H]1NC(=O)CCn1cccn1	3.84525	1.62382
446	ZINC001067478391	Z4670289904	-32.5041	58792564	0.267606	1.04251	NT	NT	NT	ND	O=C(c1cccnn1)N1CCC(O)(CNc2cncc(Cl)n2)CC1	4.3162	2.11094
447	ZINC001046685471	Z4670325416	-32.5035	58791314	0.25	1.01208	NT	NT	NT	ND	Cc1nc[nH]c1C(=O)N1CC(O)(CNC(=O)CN2CC[C@H](C)C2)C1	6.8386	2.39012
448	ZINC001043772717	Z4670289921	-32.5035	58790938	0.22973	1.16082	NT	NT	NT	ND	CN1CCCC[C@@H]1C(=O)NCC1(O)CN(C(=O)CCc2cn[nH]c2)C1	7.54386	2.9777
449	ZINC001041828396	Z4670323530	-32.5039	58790785	0.209877	1.03015	NT	NT	NT	ND	CN1CC[C@@H](C(=O)N2CC[C@@]3(CCN(Cc4nnn(C)n4)C3)C2)C1	4.70945	2.12828
450	ZINC001041431730	Z4670289899	-32.5037	58790748	0.207792	0.986044	NT	NT	NT	ND	O=C(CCn1ccnc1)N1CC(O)(CNC(=O)[C@H]2CC=CCC2)C1	2.58654	1.98047
451	ZINC001020327691	Z4670289920	-32.5039	58788316	0.28169	1.02308	NT	NT	NT	ND	Cc1nc(CN[C@H]2C[C@H](NC(=O)Cn3ncn(C)c3=O)C2)cs1	4.58514	2.14436
452	ZINC001016825715	Z4670323508	-32.5038	58787985	0.287671	1.06516	NT	NT	NT	ND	C[C@@]1(C(=O)N[C@H]2CC23CCN(CC(=O)NC2CC2)CC3)CCNC1=O	2.86034	1.22602
453	ZINC001015510639	Z4670323500	-32.5039	58787894	0.276923	0.874044	NT	NT	NT	ND	O=C(N[C@H]1CCN(CCn2cc(Cl)cn2)C1)[C@H]1CCNC1=O	4.16421	2.31056
454	ZINC000995125582	Z4670325676	-27.5045	124384340	0.291667	1.01703	NT	NT	NT	ND	CN1CC[C@H](C(=O)NC2CN(C(=O)Cc3ccc(F)cn3)C2)CC1=O	2.36115	0.940088
455	ZINC000989806749	Z4670325791	-27.5043	124383312	0.25	1.17733	NT	NT	NT	ND	CCn1ncnc1CN1CCCN(C(=O)C[C@H]2CC(=O)NC2=O)CC1	3.50406	1.72762
456	ZINC000973057271	Z4670325660	-27.5044	124380178	0.257143	1.10908	NT	NT	NT	ND	COCCN1C[C@H](C(=O)N[C@H]2C[C@H](NC(=O)c3cn[nH]c3)C2)CC1=O	4.42827	2.23613
457	ZINC000970553575	Z4670325632	-27.5041	124379913	0.253165	0.928224	NT	NT	NT	ND	COc1ccc(C(=O)N[C@@H]2CN(C(=O)C3(C)CCC3)C[C@@H]2O)nn1	5.07542	2.12659
458	ZINC000941361883	Z4670289963	-27.5049	124375758	0.240964	1.10684	NT	NT	NT	ND	Cc1cc(NC(=O)C(=O)N2CC[C@@H](NC(=O)c3cncn3C)C2)no1	3.42147	2.39538
459	ZINC000850493342	Z2591590149	-27.5045	124360876	0.25974	1.35454	NT	NT	NT	ND	CON(C)CCNC(=O)C(=O)Nc1ccc2c(c1)C(=O)N(C)C2=O	5.927	2.30577
460	ZINC000748395040	Z1334198857	-27.5043	124346989	0.223684	1.08131	NT	NT	NT	ND	CN(C(=O)CCn1cnc2c1c(=O)n(C)c(=O)n2C)c1cn[nH]c1	5.66679	2.31085
461	ZINC000659691253	Z2596554540	-27.5047	124339922	0.230769	0.820719	NT	NT	NT	ND	CNC[C@H](C)NC(=O)C(=O)NCc1ccc(N2CCO[C@@H](C)C2)nc1	5.65838	1.83935
462	ZINC000618647685	Z2645787888	-27.505	124332212	0.295775	0.917338	NT	NT	NT	ND	CN(C)S(=O)(=O)N(C)CC(=O)N[C@@H]1COc2cc(F)ccc2C1	4.75456	1.51365
463	ZINC000529344158	Z2712489017	-27.5046	124318081	0.220588	1.3477	NT	NT	NT	ND	O=C(NC[C@@H]1CNCCO1)N1CCN(S(=O)(=O)C2CC2)CC1	5.62828	2.11001
464	ZINC000442921898	Z1998020952	-27.5043	124305560	0.240741	1.11134	NT	NT	NT	ND	CO[C@H](C)CS(=O)(=O)N1CCN(C(=O)C(=O)N2CCCC2)CC1	5.91273	1.90159
465	ZINC000408001865	Z1522160855	-27.5046	124298896	0.219178	1.09996	NT	NT	NT	ND	O=C(c1cncc(N2CCOCC2)c1)N1CCN2C(=O)NC[C@@H]2C1	3.17836	1.79816
466	ZINC001363211634	Z4670325728	-27.5046	124423462	0.228571	0.786098	NT	NT	NT	ND	O=C(NCC1CN(C(=O)[C@@H]2CCc3nnc(O)n3C2)C1)C(F)(F)F	5.26758	2.12678
467	ZINC001350153389	Z2591424667	-27.505	124422681	0.222222	0.933293	NT	NT	NT	ND	O=C(Nc1ccc2c(cc[nH]c2=O)c1)C(=O)N1C[C@H](O)[C@@H](CO)C1	3.32605	1.5251
468	ZINC001341791776	Z2083030491	-27.5045	124421977	0.272727	2.21739	NT	NT	NT	ND	COc1cccc2c1OC[C@H](NC(=O)C(=O)N[C@@H]1CC(=O)N(C)C1)C2	3.35792	1.83918
469	ZINC001119470858	Z2880613867	-27.5049	124402534	0.34375	1.0679	NT	NT	NT	ND	O=C(NCCN1CCNC1=O)C(=O)NC[C@H]1CCc2ccccc21	2.86438	1.59079
470	ZINC001119173847	Z2811678854	-27.5048	124402491	0.230769	0.958132	NT	NT	NT	ND	CO[C@@H](CNC(=O)C(=O)N1C[C@@H]2C(=O)N(C)C(=O)[C@@H]2C1)CC(C)C	3.59394	1.32079
471	ZINC001109958062	Z4670325724	-27.5048	124401435	0.22973	0.902191	NT	NT	NT	ND	O=C(CN1CCNC(=O)C1)N[C@H](CNc1cc(F)ncn1)C1CC1	4.77444	2.32282
472	ZINC001074702922	Z4670325844	-27.5043	124396458	0.217391	1.08991	NT	NT	NT	ND	NC(=O)C(=O)N1CCC(O)(CNC(=O)[C@H]2CCCCC2(F)F)CC1	3.61425	1.52518
473	ZINC001065434920	Z4670325839	-27.5048	124395306	0.252747	0.5781	NT	NT	NT	ND	Cn1cc(C(=O)N2CCO[C@@H](CNC(=O)C=C3CCC3)C2)ncc1=O	2.81657	2.40589
474	ZINC001060201073	Z4670325704	-27.5046	124394662	0.232877	0.760064	NT	NT	NT	ND	O=C(NCC[C@@H]1CCN(C(=O)c2ccncn2)C1)c1c[nH]c(=O)cn1	3.51742	1.77859
475	ZINC001058732454	Z4670325694	-27.5048	124394273	0.216216	0.936347	NT	NT	NT	ND	Cn1nnc2c1ncnc2N1C[C@H]2CC[C@@H](C1)N2C(=O)c1cc[nH]n1	3.99331	2.64469
476	ZINC001058532763	Z4670325690	-27.5049	124394246	0.266667	0.952782	NT	NT	NT	ND	O=C(N[C@H]1CCN(c2cc(Cl)c(O)nn2)C1)c1c[nH]c(=O)cn1	5.13423	2.73889
477	ZINC001051633080	Z4670325829	-27.505	124393286	0.230769	1.31871	NT	NT	NT	ND	O=C(Cn1cnnn1)N[C@H]1CCN(c2ncnc3c2CCC3)C[C@H]1O	5.33918	2.31094
478	ZINC001046261579	Z4670325687	-27.5047	124392461	0.230769	1.14117	NT	NT	NT	ND	CCC[C@@H]1C[C@H]1C(=O)NCC1(O)CN(C(=O)C2CN(C(C)=O)C2)C1	5.36383	1.92163
479	ZINC000998978244	Z4670328470	-22.5042	236805874	0.234568	0.982968	NT	NT	NT	ND	Cc1cnoc1C(=O)NC1CN(C(=O)[C@@H]2CCN(C)S2(=O)=O)C1	1.60562	0.874322
480	ZINC000981250423	Z4670289989	-22.5048	236800515	0.219178	0.972019	NT	NT	NT	ND	Cn1nncc1C(=O)NC[C@H]1CC[C@@H](NC(=O)c2cnns2)C1	7.07486	2.39665
481	ZINC000968717635	Z4670325953	-22.5048	236797474	0.217391	0.945864	NT	NT	NT	ND	CCc1c(C(=O)N[C@@H]2CN(C(=O)c3n[nH]cc3C)C[C@@H]2O)cnn1C	6.06494	2.38979
482	ZINC000965338365	Z4670328442	-22.5042	236796664	0.188406	0.991281	NT	NT	NT	ND	O=C([C@H]1CCOC1)N1CCOC2(CN(C(=O)[C@@]3(F)CCOC3)C2)C1	3.44703	2.15131
483	ZINC000961583379	Z4670325927	-22.5049	236795906	0.217391	0.910584	NT	NT	NT	ND	Cc1c(C(=O)N[C@@H]2CN(C(=O)C3=COCCC3)C[C@@H]2O)cnn1C	5.88189	2.64464
484	ZINC000955144887	Z4670290004	-22.505	236794263	0.1875	0.968978	NT	NT	NT	ND	CN(C(=O)c1c[nH]c(=O)cn1)C1CN(C(=O)c2n[nH]c3c2CCC3)C1	4.5576	2.40856
485	ZINC000942457739	Z4670289985	-22.5043	236790192	0.291139	0.894363	NT	NT	NT	ND	Cn1nc(C(=O)N[C@@H]2CCN(C(=O)Cc3cscn3)C2)ccc1=O	4.01398	2.33262
486	ZINC000938242679	Z4670325888	-22.5043	236788459	0.271429	1.07137	NT	NT	NT	ND	Cc1nc(C)c(CC(=O)N2CC[C@H](NC(=O)c3cnn[nH]3)C2)c(O)n1	1.19071	0.556711
487	ZINC000907721339	Z2907375086	-22.5041	236782078	0.191176	1.18674	NT	NT	NT	ND	CS(=O)(=O)N1CC(C(=O)N2CC(=O)N(CC(F)(F)F)C2)C1	2.70431	1.67452
488	ZINC000625246444	Z2703748509	-22.5042	236732519	0.180556	1.05233	NT	NT	NT	ND	COCC(COC)N1CCN(S(=O)(=O)c2cnc(C)n2C)CC1	6.8669	1.56272
489	ZINC000407973885	Z1003275534	-22.5042	236691723	0.238095	1.20377	NT	NT	NT	ND	O=C(NC1CC1)C(=O)N1CCN(S(=O)(=O)C[C@@H]2CCCO2)CC1	7.23194	2.11137
490	ZINC000345525893	Z1657504296	-22.5045	236681776	0.191011	0.908007	NT	NT	NT	ND	C[C@@H]1OCC[C@]1(C)NC(=O)CCc1nc2c([nH]1)n(C)c(=O)nc2O	1.75078	1.57896
491	ZINC001413380655	Z4670328398	-22.5047	236868558	0.227848	1.17922	NT	NT	NT	ND	CC(=O)N[C@@H]1CCN(S(=O)(=O)c2cnn([C@@H]3CCOC3)c2)C1	3.87723	2.1042
492	ZINC001363999416	Z4670328397	-22.5046	236861114	0.190476	1.04455	NT	NT	NT	ND	O=S(=O)(N[C@@H]1CCc2nnnn2CC1)c1cnc2n1CCCC2	2.88412	1.82116
493	ZINC001326422624	Z2441305823	-22.5041	236856302	0.219178	0.991687	NT	NT	NT	ND	COC(=O)[C@@H]1C[C@H](O)CN(C(=O)C(=O)N[C@H](C)C2CCOCC2)C1	4.70659	2.12559
494	ZINC001261948364	Z2808518804	-22.5044	236850697	0.253968	0.907676	NT	NT	NT	ND	CN1C(=O)[C@H]2CN(C(=O)C(=O)NC3CCC(F)(F)CC3)C[C@H]2C1=O	4.01031	2.13695
495	ZINC001193095852	Z4670328570	-22.5047	236843572	0.246753	1.12175	NT	NT	NT	ND	CCOCCNC(=O)CN1C[C@@H](O)[C@H](NC(=O)[C@]23C[C@H]2COC3)C1	3.10993	0.935134
496	ZINC001125309519	Z4670328554	-22.5045	236835764	0.220588	0.880117	NT	NT	NT	ND	CN(C[C@@H](O)CN(C)c1ncc(F)cn1)C(=O)CCc1cnn[nH]1	3.92682	2.12616
497	ZINC001063398490	Z4670290018	-22.5049	236822006	0.257576	1.45886	NT	NT	NT	ND	CN(C)C(=O)c1cncc(N[C@H]2CC[C@H](NC(=O)C(N)=O)CC2)n1	3.93672	1.87032
498	ZINC001047126822	Z4670290017	-22.5043	236818242	0.218391	1.07218	NT	NT	NT	ND	CC(C)n1cc(C(=O)N2CC(O)(CNC(=O)c3ccnnc3)C2)nn1	4.41092	1.97855
499	ZINC001046939982	Z4670328521	-22.5045	236818218	0.215385	1.10483	NT	NT	NT	ND	NC(=O)[C@@H]1CCC[C@@H](C(=O)NCC2(O)CN(C(=O)C3CCC3)C2)C1	3.08032	1.74804
500	ZINC001046914841	Z4670326023	-22.5045	236818208	0.206897	1.0367	NT	NT	NT	ND	C[C@H](C(=O)NCC1(O)CN(C(=O)Cn2ncnn2)C1)C1CCCC1	4.72394	1.77973
501	ZINC001043817104	Z4670326017	-22.5041	236817302	0.197531	0.8854	NT	NT	NT	ND	CN(C)c1ccc(C(=O)N2CC(O)(CNC(=O)c3cnn[nH]3)C2)nc1	4.92383	1.5152
502	ZINC001043696212	Z4670290013	-22.5042	236817254	0.253521	0.845411	NT	NT	NT	ND	CNC(=O)NCC(=O)N1CC(O)(CNC(=O)c2ccc(F)s2)C1	4.74798	1.81832
503	ZINC001042722400	Z4670290011	-22.5041	236816851	0.197674	1.25199	NT	NT	NT	ND	Cn1nc(C(=O)N2CC(O)(CNC(=O)C3=CCOCC3)C2)ccc1=O	7.14323	2.39453
504	ZINC001040614201	Z4670328478	-22.5044	236816227	0.223529	1.17257	NT	NT	NT	ND	COCCC(=O)N1CC[C@@](O)(CNC(=O)[C@@H]2CCN(C)C2=O)C1	3.75449	1.98739
505	ZINC001025444165	Z4670326010	-22.505	236812931	0.2375	0.956522	NT	NT	NT	ND	Cn1nccc1C(=O)N1C[C@@H](O)[C@H](NC(=O)c2c[nH]nc2C2CC2)C1	6.87176	2.7388
506	ZINC001003297636	Z4670289993	-22.5043	236807089	0.216216	0.722759	NT	NT	NT	ND	O=C(Cn1cnnn1)N1CC(CNC(=O)C23CCCN2CCC3)C1	3.77679	1.63382

## Sheet: ZINC000450573233_analogs
No.	ZINC ID	Catalog ID	CPM at 50 nM		Ki (nM)		seletivity (sigma1/sigma2)	SMILES
			sigma2	sigma1	sigma2	sigma1
1	ZINC000450573233	ZINC000450573233	428		9.4	80	8.51064	CC(C1=CC=CC=C1)C(CN2CCC(C3=CNC4=C3C=CC=N4)CC2)O
2		Z1262980068	598					OC(CC1=CC=CC=C1)CN2CCC(C3=CNC4=C3C=CC=N4)CC2
3		Z2102296558	359		7.4	102	13.7838	OC(CC1=CC(Cl)=CC=C1)CN2CCC(C3=CNC4=C3C=CC=N4)CC2
4		Z2272647011	439					CC(C1=CC=CC=C1)C(CN2CCC(C3=CNC4=C3C=CC=N4)=CC2)O
5		Z2102236109	360					OC(CC1=CC(Cl)=CC=C1)CN2CCC(C3=CNC4=C3C=CC=N4)=CC2
6		Z4493924963	665					CC(C1=CC=CC=C1)C(CN2CCC(C3=CNC4=C3C=CC=C4)=CC2)O
7		Z2272148288	805					CC(C1=CC=CC=C1)C(CN2CCC(C3=NN=C4C=CC=CN34)CC2)O
8		Z4493924960	840					OC(C(C)C1=CC=CC=C1)CN2CCC(CC2)N3C4=C(CC3)C=CC=C4
9		Z4493929235	860					CC(C1=CC=CC=C1)C(CN2CCC(C3=C4C=CC=CC4=NC=C3)CC2)O
10		Z1665845742	353		5	233	46.6	OC(CN1CCC(C2=CNC3=C2C=CC=N3)=CC1)CCC4=CC=CC=C4
11		Z2271852773	928					CC(C1=CC=CC=C1)C(CN2CCC(C3C(NC4=C3C=CC=C4)=O)CC2)O
12		Z4493924961	774					CC(C1=CC=CC=C1)C(CN2CCC(C3=C(NC4=C3C=CC=C4)C)CC2)O
13		Z1262980323	460					OC(CN1CCC(C2=CNC3=C2C=CC=N3)CC1)COC4=CC=CC=C4
14		Z4493948739	500					OC(CC1=CC(F)=CC=C1)CN2CCC(C3=CNC4=C3C=CC=N4)CC2
15		Z4493948717	415					OC(CC1=CC(F)=CC=C1)CN2CCC(C3=CNC4=C3C=CC=N4)=CC2
16		Z1484841618	412		13	158	12.1538	OC(CN1CCC(C2=CNC3=C2C=CC=N3)=CC1)COC4=CC(Cl)=CC=C4
17		Z1241143574	500					OC(CN1CCC(C2=CNC3=C2C=CC=N3)=CC1)COC4=CC(Br)=CC=C4
18		Z4493924957	313		5.7	9.1	1.59649	CC(C1=CC=CC=C1)CCN2CCC(CC2)C3=CNC4=NC=CC=C34
19		Z1230400226	574					N1(CCC(C2=CNC3=C2C=CC=N3)CC1)CCOC4=CC=CC=C4
20		Z1612280219	795					O=C(C1=CC=CC=C1)CCN2CCC(C3=CNC4=C3C=CC=N4)CC2
21		Z1567294634	790					FC1=CC=C(C(CCN2CCC(C3=CNC4=C3C=CC=N4)CC2)=O)C=C1
22		Z4493929234	263		3.9	14	3.58974	CC(C1=CC=CC=C1)CCN2CCC(C3=CNC4=C3C=CC=N4)=CC2
23		Z1562881018	278		8.4	62	7.38095	C/C(CN1CCC(C2=CNC3=C2C=CC=N3)=CC1)=C\C4=CC=CC=C4
24		Z1262978490	442					C1(/C=C/CN2CCC(C3=CNC4=C3C=CC=N4)CC2)=CC=CC=C1
25		Z2947867435	809					N1(CCC(C2=CNC3=C2C=CC=N3)CC1)CCSC4=CC=NC=C4
26		Z1230400045	592					N1(CCC(C2=CNC3=C2C=CC=N3)CC1)CCSC4=CC=CC=C4
27		Z4493948738	723					CC(C1=CC=CC=C1)CCN2CCC(C3=CNC4=C3C=CC=C4)=CC2
28		Z1241145220	186		3.7	29	7.83784	N1(CCC(C2=CNC3=C2C=CC=N3)=CC1)CCCC4=CC=CC=C4
29		Z1665385680	620					N1(CCC(C2=CNC3=C2C=CC=N3)=CC1)CCCC4=CC=NC=C4
30		Z1905110467	801					C1(/C=C/CN2CCC(C3=CNC4=C3C=CC=N4)CC2)=CC=NC=C1
31		Z1241144480	512					N1(CCC(C2=CNC3=C2C=CC=N3)=CC1)CCSC4=CC=CC=C4
32		Z1241144621	840					O=S(C1=CC=CC=C1)CCN2CCC(C3=CNC4=C3C=CC=N4)=CC2
34		Z4493924994	771					FC1=CC2=C(C=C(C(N2)=O)CN3CCC(C4=CNC5=C4C=CC=N5)=CC3)C=C1
35		Z1348458155	511					ClC1=CC(N2CCC(C2=O)N3CCC(C4=CNC5=C4C=CC=N5)=CC3)=CC=C1
36		Z1348522601	715					ClC1=CC(N2CCC(C2=O)N3CCC(C4=CNC5=C4C=CC=N5)CC3)=CC=C1
37		Z4493929232	677					BrC1=CC(N2CCC(C2=O)N3CCC(C4=CNC5=C4C=CC=N5)CC3)=CC=C1
38		Z319033458	786					CC(C(N(CC1=CC(F)=CC=C1)C)=O)N2CCC(C3=CNC4=C3C=CC=C4)=CC2
39		Z2002520638	818					CC(C(N(CC1=CC(F)=CC=C1)C)=O)N2CCC(N3CCC4=C3C=CC=C4)CC2
40		Z106486854	802					CC(C(N(CC1=CC=CC=C1)C)=O)N2CCC(C3=NN=C4C=CC=CN34)CC2
41		Z1241144449	850					CC(C(N(C1=CC=CC=C1)C)=O)N2CCC(C3=CNC4=C3C=CC=N4)=CC2
42		Z1241143959	872					CC1=CC(NC(CN2CCC(C3=CNC4=C3C=CC=N4)=CC2)=O)=CC=C1
43		Z1492827933	734					CN(C1=CC=CC=C1)C(CCN2CCC(C3=CNC4=C3C=CC=N4)=CC2)=O
44		Z1241147220	841					CN(C(CN1CCC(C2=CNC3=C2C=CC=N3)=CC1)=O)CC4=C(F)C=CC=C4
45		Z1241143871	883					CC(C1=CC=CC=C1)N(C(CN2CCC(C3=CNC4=C3C=CC=N4)=CC2)=O)C
46		Z1241147223	654					CCN(C(CN1CCC(C2=CNC3=C2C=CC=N3)=CC1)=O)CC4=CC(F)=CC=C4
47		Z1241145825	729					CN(C(CN1CCC(C2=CNC3=C2C=CC=N3)=CC1)=O)CC4=C(Cl)C=CC=C4F
48		Z1262978782	792					CN(C(CN1CCC(C2=CNC3=C2C=CC=N3)CC1)=O)CC4=CN(C)N=C4
49		Z1262979330	822					CN(C(CN1CCC(C2=CNC3=C2C=CC=N3)CC1)=O)CC4=CC=C(S4)Cl
50		Z1241145390	904					CN(C(CN1CCC(C2=CNC3=C2C=CC=N3)=CC1)=O)CC4=CC=C(C)C=C4
51		Z1241144947	677					CN(C(CN1CCC(C2=CNC3=C2C=CC=N3)=CC1)=O)CC4=CN(C)N=C4
52		Z1241146719	740					CN(C(CN1CCC(C2=CNC3=C2C=CC=N3)=CC1)=O)CC4=CC=C(S4)Cl
53		Z1241145790	669					CN(C(CN1CCC(C2=CNC3=C2C=CC=N3)=CC1)=O)CC4=CC(Cl)=C(Cl)C=C4
54		Z1262979110	647					CN(C(CN1CCC(C2=CNC3=C2C=CC=N3)CC1)=O)CC4=CC(Cl)=CC(Cl)=C4
55		Z1540927861	907					CN(C(CCN1CCC(C2=CNC3=C2C=CC=N3)CC1)=O)CCC#N
56		Z1262980692	682					CC(C(N(CC1=CC=CC=C1)C)=O)N2CCC(C3=CNC4=C3C=CC=N4)CC2
57		Z1491031116	701					CCN(C(C(N1CCC(C2=CNC3=C2C=CC=N3)CC1)C)=O)CC4=CC=CC=C4
58		Z1230400157	652					CC(C(N(CC1=CC(F)=CC=C1)C)=O)N2CCC(C3=CNC4=C3C=CC=N4)CC2
59		Z4493929224	569					CC(C(N(CC1=CC=C(Br)C=C1)C)=O)N2CCC(C3=CNC4=C3C=CC=N4)CC2
60		Z1262980403	577					CC(C(N(CC1=C(C)C=CC=C1)C)=O)N2CCC(C3=CNC4=C3C=CC=N4)CC2

## Sheet: ZINC000895657866_analogs
No.	ZINC ID	Catalog ID	CPM at 50 nM		Ki (nM)		seletivity (sigma1/sigma2)	SMILES
			sigma2	sigma1	sigma2	sigma1
1	ZINC000895657866		695/645/347		70			CC(NCC1=CC=C2OCCOC2=C1)(C(C3=CC=CC=C3)O)C
2	7866num2119.2		697					COC1=C2OCCOC2=CC(CNC(C)(C(C3=CC=CC=C3)O)C)=C1
3	7866num567.2	Z4510628193	551		46			CC(NCC1=CC2=C(OCCO2)C(Cl)=C1)(C(C3=CC=CC=C3)O)C
4	7866num558.2	Z4510628191	410		13			CC(NCC1=CC2=C(OCCO2)C(Br)=C1)(C(C3=CC=C(Br)C=C3)O)C
5	Z1601026740	Z1601026740	766				CC(C(CC1=CC=CC=C1)O)NCC2=CC3=C(OCCO3)C(Cl)=C2
6	Z4510627652	Z4510627652	393		14			CC1=CC=C(CC(C)(NCC2=CC3=C(OCCO3)C=C2)C)C=C1
7	Z31347727	Z31347727	800					OC(C1=CC=CC=C1)CNCC2=CC3=C(OCCO3)C=C2
8	7866num3311.1	7866num3311.1	865					OC(C1=CN=CC=C1)CNCC2=CC3=C(OCCO3)C=C2
9	7866num3320.1	7866num3320.1	709					OC(C1=CN=CC=C1)CNCC2=CC3=C(C=CC=N3)C=C2
10	Z1653918014	Z1653918014	734					OC(CNCC1=CC2=C(OCCO2)C=C1)CCC3=CC=CC=C3
11	Z2146804677	Z2146804677	897					O[C@@H](CC1=CC=CC=C1)CNCC2=CC3=C(OCCO3)C=C2
12	7866num1944.2	7866num1944.2	635					CN(C1=NC=C(CNC(C)(C(C2=CC=CC=C2)O)C)C=C1)CCO
13	7866num2.2	Z4510628326	726					CC(NCC1=CC=C(OCCC#C)C=C1)(C(C2=CC=CC=C2)O)C
14	7866num575.2	Z4510628118	540		28			CC(NCC1=C(Br)C=C2OCOC2=C1)(C(C3=CC=CC=C3)O)C
15	7866num560.2	Z4510628119	584					CC(NCC1=CC(Br)=C2OCOC2=C1)(C(C3=CC=CC=C3)O)C
16	7866num2155.1	Z4510628285	525		48			COC1=C(CNC(C)(C(C2=CC=CC=C2)O)C)C=C3C=CC=CC3=C1
17	7866num562.2	Z4510628137	664					CC(NCC1=CC2=C(C=CC=C2)C(Br)=C1)(C(C3=CC=C(Br)C=C3)O)C
18	Z4510627653	Z4510627653	708					CC(NCC1=CC2=C(S1)C=CC=C2O)(C(C3=CC=CC=C3)O)C
19	7866num1973.2	7866num1973.2	182		4	>1000	>250	CN1C(CCC2=C1C=CC(CNC(C)(C(C3=CC=CC=C3)O)C)=C2)=O
20	7866num672.2	Z4510628117	545		31			CC(NCC1=NC2=C(C=CC(Cl)=C2)C=C1)(C(C3=CC=C(Br)C=C3)O)C

## Sheet: ZINC000548355486_analogs
No.	ZINC ID	Catalog ID	CPM at 50 nM		Ki (nM)		seletivity (sigma1/sigma2)	SMILES
			sigma2	sigma1	sigma2	sigma1
1	ZINC000548355486		261/290/260		8			CC1CCC(CN2CC(C2)CC3=CC=C(C(F)=C3)F)(CC1)O
2	5486num913	5486num913	354					CC1CCC(CN2CC(C2)CC3=CC=CC=C3)(CC1)O
3	Z4430418526	Z4430418526	174		3			CC1CCC(CC1)CN2CC(C2)CC3=CC=C(F)C=C3
4	Z4430417979	Z4430417979	188		5			CC1CCC(CC1)CN2CC(C2)CC3=CC=CC=C3
5	5486num156	Z4510627671	522					CC1CCC(CN2CC(C2)CC3=CC(C)=CC=C3)(CC1)O
6	5486num60	Z4510627674	430					CC1CCC(CN2CC(C2)CC3=C(C)C=CC=C3)(CC1)O
7	5486num914	Z4510627673	308					CC1CCC(CN2CC(C2)CC3=CC=C(Cl)C=C3)(CC1)O
8	Z4510627683	Z4510627683	427					CC1CCC(CN2CC(C2)CC3=C(C(F)(F)F)C=CC=C3)(CC1)O
9	5486num911	Z4510627672	399					CC1CCC(CN2CC(C2)CC3=C(Br)C=CC=C3)(CC1)O
10	5486num940	Z4510627684	611					CC1CCC(CN2CC(OC3=CC=C(F)C=C3)C2)(CC1)O
11	5486num943	Z4510627675	714					CC1CCC(CN2CC(OC3=CC(F)=CC=C3)C2)(CC1)O
12	5486num2766	5486num2766	453					OC1(CCSCC1)CN2CC(C2)CC3=CC=C(Cl)C=C3
13	5486num2770	5486num2770	553					OC1(CCSCC1)CN2CC(C2)CC3=CC(F)=C(F)C=C3
14	5486num2768.2	5486num2768.2	589					OC1(CCCOC1)CN2CC(C2)CC3=CC(F)=C(F)C=C3
15	5486num2758.1	5486num2758.1	763					OC1(CCCOC1)CN2CC(C2)CC3=CC(Br)=CC=C3
16	5486num2765	5486num2765	704					OC1(CCOCC1)CN2CC(C2)CC3=CC=C(Cl)C=C3
17	5486num2751	Z4510627688	476					OC1(CCSCC1)CN2CC(C2)CC3=CC(Br)=CC=C3
18	5486num2756	Z4510627687	470					OC1(CCSCC1)CN2CC(C2)CC3=CC=C(Br)C=C3
19	5486num3075.1	5486num3075.1	749					OC(CC1(CCCCC1)O)CNCC2=CC(Cl)=C(F)C=C2
20	5486num2704.1	5486num2704.1	858					OC(CC1=CC(F)=CC=C1)CNCC(C=C2)=NNC2=O
21	5486num302.2	Z1504291172	292					CC(NCCC1CCC(CC1)C)CC2=CC=C(O)C=C2
22	5486num570.2	Z4510628128	235		14			CC1CCCC(N[C@H]2C[C@H](C3=CC(Br)=C(F)C=C3)C2)CC1
23	5486num1704.1	Z4510628228	496					CC(CCC(CN1CC(C1)CC2=CC(Br)=CC=C2)O)C
24	5486num495	Z4510627693	457					CC1=C(C)C=C(CN2CC(C2)CC3=CC(F)=C(F)C=C3)C=C1
25	5486num2260	Z4510627694	576					COC1=CC(Cl)=C(CN2CC(C2)CC3=CC(F)=C(F)C=C3)C=C1
26	5486num483	Z4510627677	688					CC1=CC(F)=C(CN2CC(C2)CC3=CC(Br)=CC=C3)C=C1
27	5486num2642	5486num2642	365					FC1=C(F)C=C(CC2CN(C2)CC3=C(F)C=C(C#N)C=C3)C=C1
28	5486num493	Z4510627692	611					CC1=C(Br)C=C(CN2CC(C2)CC3=CC(F)=C(F)C=C3)C=C1
29	5486num2735	Z4510627682	662					OC1=C(CN2CC(C2)CC3=CC(Br)=CC=C3)C=CC(F)=C1
30	5486num484	Z4510627678	738					CC1=C(F)C=C(CN2CC(C2)CC3=C(Br)C=CC=C3)C=C1
